# Supplementary material for: Silver-catalyzed cascade reaction of tosylmethyl isocyanide (TosMIC) with propargylic alcohols to (E)-vinyl sulfones: dual roles of TosMIC
Source: Royal Society of Chemistry journal article supplement (doi:10.1039/c5ob01129a), 2015-01-01

*Supporting Information for*

**Silver-Catalyzed Cascade Reaction of Tosylmethyl  
Isocyanide (TosMIC) with Propargylic Alcohols to (*E*)-Vinyl  
Sulfones: Dual Roles of TosMIC**

Haniya Bounar,<sup>a</sup> Zhenhua Liu,<sup>a</sup> Lin Zhang,<sup>a</sup> Xiaoxue Guan,<sup>a</sup> Zonglian Yang,<sup>a</sup> Peiqiu Liao,<sup>a</sup> Xihe Bi,<sup>\*,a</sup>  
Xingqi Li<sup>\*,a</sup>

<sup>a</sup> Department of Chemistry, Northeast Normal University, Changchun 130024, China. E-

mail: [lixq653@nenu.edu.cn](mailto:lixq653@nenu.edu.cn);

**Contents**

|                                                                     |           |
|---------------------------------------------------------------------|-----------|
| <b>I. General information.....</b>                                  | <b>2</b>  |
| <b>II. Synthesis and analytical data of compounds 3a-3p.....</b>    | <b>2</b>  |
| <b>III. Synthesis and analytical data of compounds 5 and 7.....</b> | <b>8</b>  |
| <b>IV. NMR spectra copies.....</b>                                  | <b>10</b> |

## I. General information

All reagents were purchased from commercial sources and used without treatment, unless otherwise indicated. The products were purified by column chromatography over silica gel.  $^1\text{H-NMR}$  and  $^{13}\text{C-NMR}$  spectra were recorded at 25 °C on a Varian 500 MHz and 125 MHz, respectively, and TMS was used as internal standard. Mass spectra were recorded on BRUKER AutoflexIII Smartbeam MS-spectrometer. High resolution mass spectra (HRMS) were recorded on Bruker microTof by using ESI method.

## II. Synthesis and analytical data of compounds 3a-3p

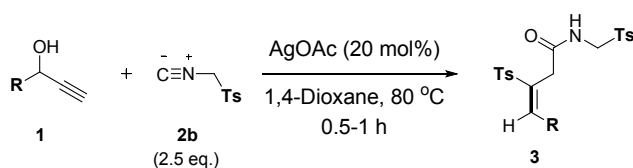

**Typical synthetic procedure** (with **3a** as an example): To a mixture of 1-phenylprop-2-yn-1-ol (**1a**) (66mg, 0.5 mmol) and AgOAc (16.7mg, 0.1 mmol) in 1,4-dioxane (0.5 mL), 1-isocyanomethanesulfonyl-4-methyl-benzene (**2b**) (244mg, 1.25 mmol) which was dissolved in 2.0 mL 1,4-dioxane and added in 10 minutes at 80 °C. The reaction mixture was then stirred for 0.5 h-1 h until substrate **1a** had been consumed as indicated by TLC. The resulting mixture was concentrated and taken up by dichloromethane. The organic layer was washed with brine, dried over MgSO<sub>4</sub> and concentrated. Purification of the crude product with flash column chromatography (silica gel; petroleum ether: ethyl acetate = 3: 1) gave **3a** in 88% yield as a white solid.

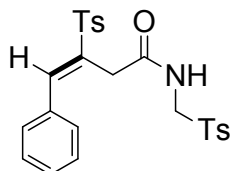

**(E)-4-phenyl-3-tosyl-N-(tosylmethyl)but-3-enamide (3a)**. White solid, m.p. 157-158 °C;  $^1\text{H NMR}$  (500 MHz,  $\text{CDCl}_3$ )  $\delta$  2.21 (s, 3H), 2.43 (s, 3H), 3.24 (s, 2H), 4.70 (d,  $J = 6.5$  Hz, 2H), 7.15 (d,  $J = 8.0$  Hz, 2H), 7.34 (d,  $J = 8.0$  Hz, 2H), 7.37-7.45 (m, 5H); 7.74 (d,  $J = 8.0$  Hz, 2H), 7.77 (d,  $J = 8.0$  Hz, 2H), 7.94 (s, 1H), 8.02 (t,  $J = 6.5$  Hz, 1H);  $^{13}\text{C NMR}$  ( $\text{CDCl}_3$ , 125 MHz)  $\delta$  21.5, 21.6, 35.1, 60.3, 128.3, 128.8, 129.0, 129.9, 130.2, 130.4, 130.8, 132.0, 133.1, 133.7, 134.8, 142.5, 145.16, 145.21, 167.7; HRMS (ESI)  $m/z$  calculated for  $\text{C}_{25}\text{H}_{26}\text{NO}_5\text{S}_2$   $[\text{M}+\text{H}]^+$ : 484.1141, found: 484.1145.

---

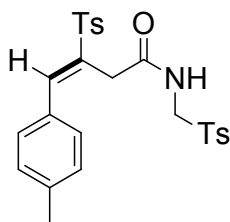

**(E)-4-(p-tolyl)-3-tosyl-N-(tosylmethyl)but-3-enamide (3b).** White solid, m.p. 161-162 °C;  $^1\text{H NMR}$  (500 MHz,  $\text{CDCl}_3$ )  $\delta$  2.21 (s, 3H), 2.38 (s, 3H), 2.44 (s, 3H), 3.21 (s, 2H), 4.68 (d,  $J = 6.5$  Hz, 2H), 7.14 (d,  $J = 8.0$  Hz, 2H), 7.20 (d,  $J = 8.0$  Hz, 2H), 7.34 (d,  $J = 8.5$  Hz, 4H), 7.72 (d,  $J = 8.5$  Hz, 2H), 7.76 (d,  $J = 8.5$  Hz, 2H), 7.91 (s, 1H), 8.00 (t,  $J = 6.5$  Hz, 1H);  $^{13}\text{C NMR}$  ( $\text{CDCl}_3$ , 125 MHz)  $\delta$  21.5, 21.7, 35.2, 60.3, 128.2, 128.8, 129.3, 129.7, 129.9, 130.1, 130.6, 131.7, 133.7; 134.9, 141.5, 142.5, 145.08, 145.10, 167.8; **HRMS** (ESI)  $m/z$  calculated for  $\text{C}_{26}\text{H}_{28}\text{NO}_5\text{S}_2$   $[\text{M}+\text{H}]^+$ : 498.1403, found: 498.1408.

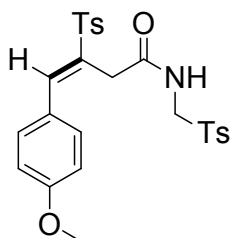

**(E)-4-(4-methoxyphenyl)-3-tosyl-N-(tosylmethyl)but-3-enamide (3c).** White solid, m.p. 165-166 °C;  $^1\text{H NMR}$  (500 MHz,  $\text{CDCl}_3$ )  $\delta$  2.21 (s, 3H), 2.42 (s, 3H), 3.20 (s, 2H), 3.83 (s, 3H), 4.67 (d,  $J = 6.5$  Hz, 2H), 6.89 (d,  $J = 9.0$  Hz, 2H), 7.12 (d,  $J = 8.5$  Hz, 2H), 7.33 (d,  $J = 8.0$  Hz, 2H), 7.44 (d,  $J = 9.0$  Hz, 2H), 7.70 (d,  $J = 8.0$  Hz, 2H), 7.75 (d,  $J = 8.0$  Hz, 2H), 7.87 (s, 1H), 8.06 (t,  $J = 7.0$  Hz, 1H);  $^{13}\text{C NMR}$  ( $\text{CDCl}_3$ , 125 MHz)  $\delta$  21.5, 21.6, 35.2, 55.4, 60.3, 114.4, 124.7, 128.1, 128.8, 129.75, 129.81, 130.1, 132.6, 133.7, 135.1, 142.0, 144.95, 145.04, 161.7, 168.0; **HRMS** (ESI)  $m/z$  calculated for  $\text{C}_{26}\text{H}_{28}\text{NO}_6\text{S}_2$   $[\text{M}+\text{H}]^+$ : 514.1353, found: 514.1352.

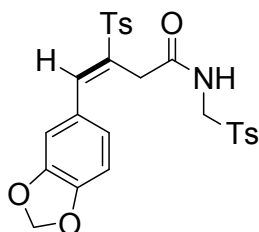

**(E)-4-(benzo[d][1,3]dioxol-5-yl)-3-tosyl-N-(tosylmethyl)but-3-enamide (3d).** White solid, m.p. 133-134 °C;  $^1\text{H NMR}$  (500 MHz,  $\text{CDCl}_3$ )  $\delta$  2.26 (s, 3H), 2.43 (s, 3H), 3.20 (s, 2H), 4.67 (d,  $J = 6.5$  Hz, 2H), 6.01 (s, 2H), 6.82 (d,  $J = 8.5$  Hz, 1H), 7.00 (d,  $J = 7.5$  Hz, 2H), 7.18 (d,  $J = 8.0$  Hz, 2H), 7.33 (d,  $J = 8.0$  Hz, 2H), 7.73-7.76 (m, 4H), 7.82 (s, 1H), 8.00 (t,  $J = 6.5$  Hz, 1H);  $^{13}\text{C NMR}$  ( $\text{CDCl}_3$ , 125 MHz)  $\delta$  21.5, 21.6, 35.0, 60.3, 101.8, 108.7, 109.8, 126.2, 126.7, 128.1, 128.8, 129.8, 130.1, 130.6, 133.7, 135.0, 142.1, 145.0, 145.1, 148.2, 149.9, 167.8; **HRMS** (ESI)  $m/z$  calculated for  $\text{C}_{26}\text{H}_{26}\text{NO}_7\text{S}_2$   $[\text{M}+\text{H}]^+$ : 528.1145, found: 528.1148.

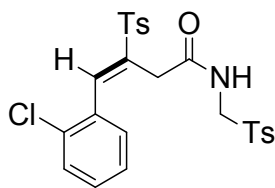

**(E)-4-(2-chlorophenyl)-3-tosyl-N-(tosylmethyl)but-3-enamide (3e).** White solid, m.p. 180-181 °C; **<sup>1</sup>H NMR** (500 MHz, CDCl<sub>3</sub>) δ 2.29 (s, 3H), 2.45 (s, 3H), 3.10 (s, 2H), 4.69 (d, *J* = 6.5 Hz, 2H), 7.25-7.30 (m, 5H), 7.33-7.38 (m, 3H), 7.43 (d, *J* = 8.0 Hz, 1H), 7.78 (d, *J* = 8.0 Hz, 2H), 7.81 (d, *J* = 8.5 Hz, 2H), 7.87 (t, *J* = 6.5 Hz, 1H), 8.17 (s, 1H); **<sup>13</sup>C NMR** (CDCl<sub>3</sub>, 125 MHz) δ 21.6, 21.7, 34.9, 60.4, 127.1, 128.4, 128.9, 129.6, 130.2, 130.5, 131.3, 133.8, 134.5, 134.8, 136.3, 140.1, 145.3, 145.3, 167.7; **HRMS** (ESI) *m/z* calculated for C<sub>25</sub>H<sub>25</sub>ClNO<sub>5</sub>S<sub>2</sub> [M+H]<sup>+</sup>: 518.0867, found: 518.0870.

---

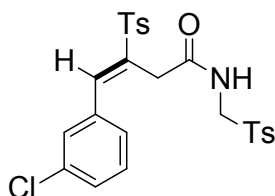

**(E)-4-(3-chlorophenyl)-3-tosyl-N-(tosylmethyl)but-3-enamide (3f).** White solid, m.p. 159-160 °C; **<sup>1</sup>H NMR** (500 MHz, CDCl<sub>3</sub>) δ 2.21 (s, 3H), 2.45 (s, 3H), 3.20 (s, 2H), 4.70 (d, *J* = 6.5 Hz, 2H), 7.17 (d, *J* = 8.0 Hz, 2H), 7.31-7.35 (m, 2H), 7.36-7.41 (m, 3H), 7.42 (s, 1H), 7.74 (d, *J* = 8.0 Hz, 2H), 7.77 (d, *J* = 8.0 Hz, 2H), 7.84 (s, 1H), 7.99 (t, *J* = 6.5 Hz, 1H); **<sup>13</sup>C NMR** (CDCl<sub>3</sub>, 125 MHz) δ 21.5, 21.6, 34.9, 60.3, 128.0, 128.3, 128.8, 129.8, 130.0, 130.05, 130.13, 130.2, 130.5, 133.7, 133.8, 134.6, 134.8, 135.1, 140.8, 145.2, 145.4, 167.4; **HRMS** (ESI) *m/z* calculated for C<sub>25</sub>H<sub>25</sub>ClNO<sub>5</sub>S<sub>2</sub> [M+H]<sup>+</sup>: 518.0950, found: 518.0954.

---

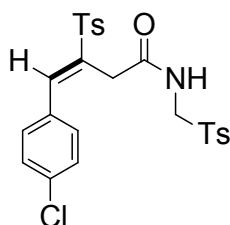

**(E)-4-(4-chlorophenyl)-3-tosyl-N-(tosylmethyl)but-3-enamide (3g).** White solid, m.p. 189-190 °C; **<sup>1</sup>H NMR** (500 MHz, CDCl<sub>3</sub>) δ 2.24 (s, 3H), 2.44 (s, 3H), 3.20 (s, 2H), 4.68 (d, *J* = 6.5 Hz, 2H), 7.16 (d, *J* = 7.5 Hz, 2H), 7.34-7.40 (m, 6H), 7.72 (d, *J* = 8.5 Hz, 2H), 7.76 (d, *J* = 8.0 Hz, 2H), 7.86 (s, 1H), 7.99 (t, *J* = 6.0 Hz, 1H); **<sup>13</sup>C NMR** (CDCl<sub>3</sub>, 125 MHz) δ 21.5, 21.7, 35.1, 60.3, 128.3, 128.8, 129.2, 129.9, 130.2, 130.5, 133.8, 131.7, 133.76,

133.79, 134.6, 137.0, 141.0, 145.2, 145.4, 167.6; **HRMS** (ESI)  $m/z$  calculated for  $C_{25}H_{25}ClNO_5S_2$   $[M+H]^+$ : 518.0977, found: 518.0980.

---

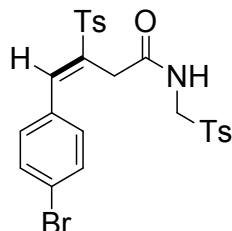

**(E)-4-(4-bromophenyl)-3-tosyl-N-(tosylmethyl)but-3-enamide (3h)**. White solid, m.p. 185-186 °C;  $^1H$  NMR (500 MHz,  $CDCl_3$ )  $\delta$  2.25 (s, 3H), 2.42 (s, 3H), 3.21 (s, 2H), 4.67 (d,  $J = 6.5$  Hz, 2H), 7.16 (d,  $J = 8.0$  Hz, 2H), 7.30 (d,  $J = 8.0$  Hz, 2H), 7.33 (d,  $J = 8.0$  Hz, 2H), 7.48 (d,  $J = 8.0$  Hz, 2H), 7.72 (d,  $J = 8.0$  Hz, 2H), 7.76 (d,  $J = 8.0$  Hz, 2H), 7.84 (s, 1H), 7.99 (t,  $J = 6.5$  Hz, 1H);  $^{13}C$  NMR ( $CDCl_3$ , 125 MHz)  $\delta$  21.5, 21.6, 35.0, 60.3, 125.3, 128.3, 128.8, 129.9, 130.2, 131.0, 131.7, 132.2, 133.7; 134.1, 134.6, 141.0, 145.2, 145.3, 167.5; **HRMS** (ESI)  $m/z$  calculated for  $C_{25}H_{24}BrNaNO_5S_2$   $[M+Na]^+$ : 586.0148, found: 586.0145.

---

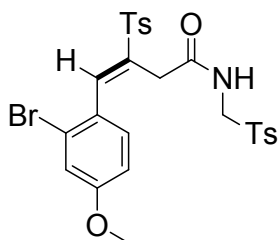

**(E)-4-(2-bromo-4-methoxyphenyl)-3-tosyl-N-(tosylmethyl)but-3-enamide (3i)**. White solid, m.p. 174-175 °C;  $^1H$  NMR (500 MHz,  $CDCl_3$ )  $\delta$  2.29 (s, 3H), 2.43 (s, 3H), 3.13 (s, 2H), 3.71 (s, 3H), 4.70 (d,  $J = 6.5$  Hz, 2H), 6.80-6.82 (m, 1H), 6.94 (s, 1H), 7.26 (d,  $J = 8.0$  Hz, 2H), 7.35 (d,  $J = 8.0$  Hz, 2H), 7.45 (d,  $J = 9.0$  Hz, 1H), 7.78 (d,  $J = 8.0$  Hz, 2H), 7.83 (d,  $J = 8.5$  Hz, 2H), 8.04 (t,  $J = 6.5$  Hz, 1H), 8.10 (s, 1H);  $^{13}C$  NMR ( $CDCl_3$ , 125 MHz)  $\delta$  21.5, 21.6, 35.0, 56.0, 60.5, 114.7, 114.9, 118.9, 128.4, 128.8, 130.0, 130.1, 132.8, 133.3; 133.8, 134.8, 136.1, 142.6, 145.27, 145.32, 159.0, 167.8; **HRMS** (ESI)  $m/z$  calculated for  $C_{26}H_{26}BrNO_6S_2$   $[M+H]^+$ : 594.0463, found: 594.0461.

---

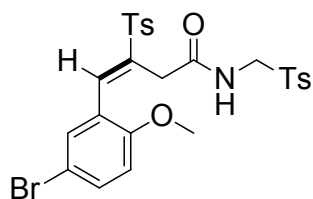

**(E)-4-(5-bromo-2-methoxyphenyl)-3-tosyl-N-(tosylmethyl)but-3-enamide (3j).** White solid, m.p. 169-170 °C;  $^1\text{H NMR}$  (500 MHz,  $\text{CDCl}_3$ )  $\delta$  2.20 (s, 3H), 2.43 (s, 3H), 3.10 (s, 2H), 3.88 (s, 3H), 4.66 (d,  $J = 6.5$  Hz, 2H), 6.81 (d,  $J = 8.0$  Hz, 1H), 7.18 (d,  $J = 8.0$  Hz, 2H), 7.28 (d,  $J = 2.0$  Hz, 1H), 7.34 (d,  $J = 8.0$  Hz, 2H), 7.47 (dd,  $J = 2.5$  Hz,  $J = 8.0$  Hz, 1H), 7.68 (d,  $J = 8.0$  Hz, 2H), 7.77 (d,  $J = 8.0$  Hz, 2H), 7.84 (t,  $J = 6.5$  Hz, 1H), 8.14 (s, 1H);  $^{13}\text{C NMR}$  ( $\text{CDCl}_3$ , 100 MHz)  $\delta$  21.5, 21.7, 34.9, 56.0, 60.3, 112.3, 112.9, 123.0, 128.3, 128.9, 129.9, 130.1, 132.4, 133.5, 134.4, 135.0, 137.4, 145.1, 145.2, 156.9, 167.3; **HRMS** (ESI)  $m/z$  calculated for  $\text{C}_{26}\text{H}_{27}\text{BrNO}_5\text{S}_2$   $[\text{M}+\text{H}]^+$ : 592.0463, found: 592.0465.

---

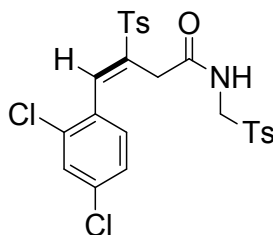

**(E)-4-(2,4-dichlorophenyl)-3-tosyl-N-(tosylmethyl)but-3-enamide (3k).** White solid, 195-196 °C;  $^1\text{H NMR}$  (500 MHz,  $\text{CDCl}_3$ )  $\delta$  2.32 (s, 3H), 2.45 (s, 3H), 3.10 (s, 2H), 4.70 (d,  $J = 6.5$  Hz, 2H), 7.21 (d,  $J = 7.5$  Hz, 1H), 7.27-7.32 (m, 4H), 7.37 (d,  $J = 8.0$  Hz, 2H), 7.45 (s, 1H), 7.79-7.81 (m, 4H), 7.89 (t,  $J = 6.5$  Hz, 1H), 8.08 (s, 1H);  $^{13}\text{C NMR}$  ( $\text{CDCl}_3$ , 125 MHz)  $\delta$  21.6, 21.7, 35.0, 60.3, 127.6, 128.4, 128.9, 129.0, 129.6, 130.0, 130.3, 131.4, 133.8, 134.6, 135.3, 136.9, 138.9, 145.4, 145.5, 167.6; **HRMS** (ESI)  $m/z$  calculated for  $\text{C}_{25}\text{H}_{24}\text{Cl}_2\text{NO}_5\text{S}_2$   $[\text{M}+\text{H}]^+$ : 552.0467, found: 552.0470.

---

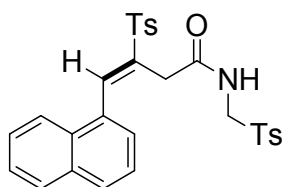

**(E)-4-(naphthalen-1-yl)-3-tosyl-N-(tosylmethyl)but-3-enamide (3l).** White solid, m.p. 196-197 °C;  $^1\text{H NMR}$  (500 MHz,  $\text{CDCl}_3$ )  $\delta$  1.90 (s, 3H), 2.45 (s, 3H), 3.30 (s, 2H), 4.73 (d,  $J = 6.5$  Hz, 2H), 7.01 (d,  $J = 8.0$  Hz, 2H), 7.36 (d,  $J = 8.0$  Hz, 2H), 7.50-7.57 (m, 3H), 7.71 (d,  $J = 8.0$  Hz, 2H), 7.81-7.85 (m, 5H), 7.93 (s, 1H), 8.09 (s, 1H), 8.11 (t,  $J = 6.5$  Hz, 1H);  $^{13}\text{C NMR}$  ( $\text{CDCl}_3$ , 125 MHz)  $\delta$  21.2, 21.7, 35.4, 60.3, 126.7, 126.9, 127.5, 128.0, 128.3, 128.6, 129.1, 129.4, 129.8, 130.2, 131.4, 132.9, 133.1, 133.7, 133.9, 134.8, 142.5, 145.1, 145.3, 167.9; **HRMS** (ESI)  $m/z$  calculated for  $\text{C}_{29}\text{H}_{28}\text{NO}_5\text{S}_2$   $[\text{M}+\text{H}]^+$ : 534.1389, found: 534.1387.

---

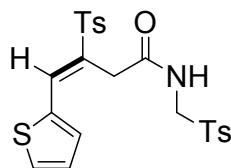

**(E)-4-(thiophen-2-yl)-3-tosyl-N-(tosylmethyl)but-3-enamide (3m)**. White solid, m.p. 177-178 °C;  $^1\text{H NMR}$  (500 MHz,  $\text{CDCl}_3$ )  $\delta$  2.29 (s, 3H), 2.44 (s, 3H), 3.29 (s, 2H), 4.64 (d,  $J = 6.5$  Hz, 2H), 7.13-7.17 (m, 3H), 7.34 (d,  $J = 8.0$  Hz, 2H), 7.46 (d,  $J = 3.5$  Hz, 1H), 7.56 (d,  $J = 5.0$  Hz, 1H), 7.69 (d,  $J = 8.0$  Hz, 2H), 7.75-7.80 (m, 3H), 8.03 (s, 1H);  $^{13}\text{C NMR}$  ( $\text{CDCl}_3$ , 125 MHz)  $\delta$  21.6, 35.3, 60.3, 128.2, 128.6, 128.8, 129.4, 129.7, 130.2, 131.7, 133.7, 133.8, 133.9, 134.8, 135.2, 145.0, 145.2, 166.9; **HRMS** (ESI)  $m/z$  calculated for  $\text{C}_{23}\text{H}_{23}\text{NNaO}_5\text{S}_3$   $[\text{M}+\text{Na}]^+$ : 512.0631, found: 512.0635.

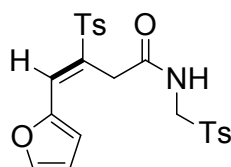

**(E)-4-(furan-2-yl)-3-tosyl-N-(tosylmethyl)but-3-enamide (3n)**. White solid, m.p. 141-142 °C;  $^1\text{H NMR}$  (500 MHz,  $\text{CDCl}_3$ )  $\delta$  2.35 (s, 3H), 2.43 (s, 3H), 3.36 (s, 2H), 4.61 (d,  $J = 7.0$  Hz, 2H), 6.50-6.52 (m, 1H), 6.88 (d,  $J = 3.5$  Hz, 1H), 7.19 (d,  $J = 8.0$  Hz, 2H), 7.33 (d,  $J = 8.0$  Hz, 2H), 7.51 (t,  $J = 6.5$  Hz, 1H), 7.56 (s, 1H), 7.67-7.69 (m, 3H), 7.74 (d,  $J = 8.5$  Hz, 2H);  $^{13}\text{C NMR}$  ( $\text{CDCl}_3$ , 125 MHz)  $\delta$  21.6, 21.7, 35.2, 60.3, 112.8, 118.7, 128.0, 128.2, 128.7, 129.1, 129.8, 130.1, 133.8, 134.9, 145.0, 145.1, 146.3, 148.4, 167.3; **HRMS** (ESI)  $m/z$  calculated for  $\text{C}_{23}\text{H}_{24}\text{NO}_6\text{S}_2$   $[\text{M}+\text{H}]^+$ : 474.1040, found: 474.1044.

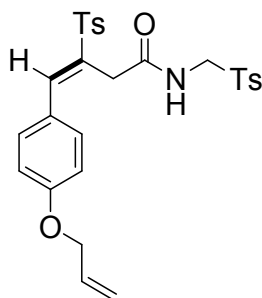

**(E)-4-(4-(allyloxy)phenyl)-3-tosyl-N-(tosylmethyl)but-3-enamide (3o)**. White solid, m.p. 165-166 °C;  $^1\text{H NMR}$  (500 MHz,  $\text{CDCl}_3$ )  $\delta$  2.14 (s, 3H), 2.36 (s, 3H), 3.13 (s, 2H), 4.90 (d,  $J = 5.0$  Hz, 2H), 4.61 (d,  $J = 7.0$  Hz, 1H), 5.23 (d,  $J = 10.5$  Hz, 1H), 5.32 (d,  $J = 17.0$  Hz, 1H), 5.92-6.00 (m, 1H), 6.84 (d,  $J = 9.0$  Hz, 2H), 7.06 (d,  $J = 8.0$  Hz, 2H), 7.26 (d,  $J = 8.0$  Hz, 2H), 7.36 (d,  $J = 8.5$  Hz, 2H), 7.64 (d,  $J = 8.0$  Hz, 2H), 7.68 (d,  $J = 8.0$  Hz, 2H), 7.80

(s, 1H), 8.00 (t,  $J = 6.5$  Hz, 1H);  $^{13}\text{C}$  NMR ( $\text{CDCl}_3$ , 100 MHz)  $\delta$  21.5, 21.6, 35.2, 60.3, 68.8, 115.1, 118.2, 124.8, 128.1, 128.8, 129.8, 129.9, 130.1, 132.4, 132.6, 133.7, 135.1, 142.0, 144.9, 145.1, 160.7, 168.0; HRMS (ESI)  $m/z$  calculated for  $\text{C}_{28}\text{H}_{30}\text{NO}_6\text{S}_2$   $[\text{M}+\text{H}]^+$ : 540.1515, found: 540.1520.

---

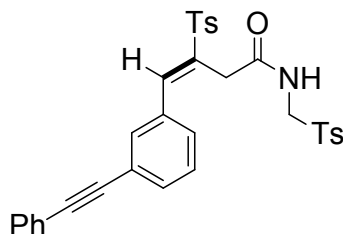

(*E*)-4-(3-(phenylethynyl)phenyl)-3-tosyl-*N*-(tosylmethyl)but-3-enamide (**3p**). White solid, m.p. 149-150 °C;  $^1\text{H}$  NMR (500 MHz,  $\text{CDCl}_3$ )  $\delta$  2.21 (s, 3H), 2.44 (s, 3H), 3.24 (s, 2H), 4.70 (d,  $J = 6.5$  Hz, 2H), 7.15 (d,  $J = 8.0$  Hz, 2H), 7.36-7.42 (m, 7H), 7.53-7.57 (m, 4H), 7.74 (d,  $J = 8.5$  Hz, 2H), 7.78 (d,  $J = 8.0$  Hz, 2H), 7.89 (s, 1H), 7.96 (t,  $J = 6.5$  Hz, 1H);  $^{13}\text{C}$  NMR ( $\text{CDCl}_3$ , 125 MHz)  $\delta$  21.5, 21.6, 35.0, 60.4, 88.1, 90.7, 122.7, 124.2, 128.3, 128.4, 128.6, 128.8, 129.1, 129.2, 129.9, 130.2, 131.7, 132.4, 133.3, 133.6, 133.8, 134.6, 134.8, 141.6, 145.2, 145.3, 167.5; HRMS (ESI)  $m/z$  calculated for  $\text{C}_{33}\text{H}_{30}\text{NO}_5\text{S}_2$   $[\text{M}+\text{H}]^+$ : 584.1567, found: 584.1567.

---

### III. Synthesis and analytical data of compounds 5 and 7

#### Synthesis of 5 from 3a

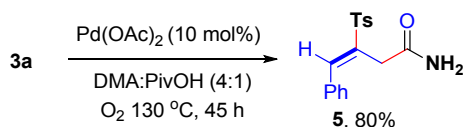

To a mixture of (*E*)-4-phenyl-3-tosyl-*N*-(tosylmethyl)but-3-enamide (**3a**) (242 mg, 0.5 mmol) in 2.5 mL of *N,N*-dimethylformamide: pivalic acid (4:1) at 130 °C with oxygen balloon,  $\text{Pd}(\text{OAc})_2$  (11.3 mg, 0.05 mmol) was added. The reaction mixture was then stirred for 45 h until substrate **3a** had been consumed as indicated by TLC. The resulting mixture was concentrated and taken up by dichloromethane. The organic layer was washed with brine, dried over  $\text{MgSO}_4$  and concentrated. Purification of the crude product with flash column chromatography (silica gel; petroleum ether: ethyl acetate = 1: 1) gave **5** in 80% yield as a white solid.

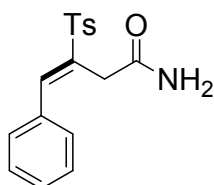



**(E)-4-phenyl-3-tosylbut-3-enamide (5)**. White solid, m.p. 193-194 °C;  $^1\text{H NMR}$  (500 MHz,  $\text{CDCl}_3$ )  $\delta$  2.44 (s, 3H), 3.33 (s, 2H), 5.45 (s, 1H), 6.90 (s, 1H), 7.35 (d,  $J = 8.0$  Hz, 2H), 7.42-7.47 (m, 3H), 7.59-7.63 (m, 2H), 7.80 (d,  $J = 8.5$  Hz, 2H), 7.99 (s, 1H);  $^{13}\text{C NMR}$  ( $\text{CDCl}_3$ , 125 MHz)  $\delta$  21.7, 35.3, 128.3, 129.1, 130.1, 130.3, 130.7, 132.3, 134.0, 135.0, 142.0, 145.1, 170.3; **HRMS** (ESI)  $m/z$  calculated for  $\text{C}_{17}\text{H}_{18}\text{NO}_3\text{S}$   $[\text{M}+\text{H}]^+$ : 518.0950, found: 518.0954.

---

### Synthetic procedure for 7

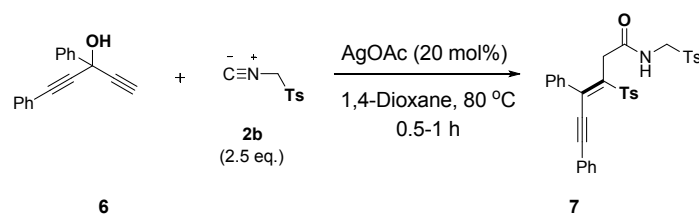

To a mixture of 1,3-diphenylpenta-1,4-diyne-3-ol (**6**) (116 mg, 0.5 mmol) and AgOAc (16.7 mg, 0.1 mmol) in 1,4-dioxane (0.5 mL), 1-isocyanomethanesulfonyl-4-methyl-benzene (**2b**) (244 mg, 1.25 mmol) which was dissolved in 2.0 mL 1,4-dioxane and added in 10 minutes at 80 °C. The reaction mixture was then stirred for 0.5 h-1 h until substrate 1a had been consumed as indicated by TLC. The resulting mixture was concentrated and taken up by dichloromethane. The organic layer was washed with brine, dried over  $\text{MgSO}_4$  and concentrated. Purification of the crude product with flash column chromatography (silica gel; petroleum ether: ethyl acetate = 3: 1) gave **7** in 37% yield as a white solid.

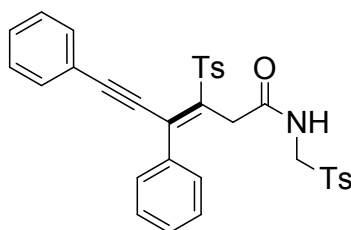

**(Z)-4,6-diphenyl-3-tosyl-N-(tosylmethyl)hex-3-en-5-ynamide (7)**. White solid, m.p. 215-216 °C;  $^1\text{H NMR}$  (500 MHz,  $\text{CDCl}_3$ )  $\delta$  2.33 (s, 3H), 2.38 (s, 3H), 3.48 (s, 2H), 4.75 (d,  $J = 6.5$  Hz, 2H), 7.00 (t,  $J = 6.5$  Hz, 1H), 7.19 (d,  $J = 8.0$  Hz, 2H), 7.30 (d,  $J = 8.0$  Hz, 2H), 7.33-7.42 (m, 10H), 7.84-7.88 (m, 4H);  $^{13}\text{C NMR}$  ( $\text{CDCl}_3$ , 125 MHz)  $\delta$  21.65, 21.70, 31.0, 37.9, 60.5, 86.9, 106.3, 121.9, 128.2, 128.41, 128.43, 128.5, 129.0, 129.2, 129.4, 129.7, 130.1, 131.7, 136.9, 137.0, 137.1, 141.0, 144.3, 145.2, 168.6; **HRMS** (ESI)  $m/z$  calculated for  $\text{C}_{33}\text{H}_{29}\text{NO}_5\text{S}_2$   $[\text{M}+\text{H}]^+$ : 518.0950, found: 518.0954.

---

#### IV. NMR spectra copies

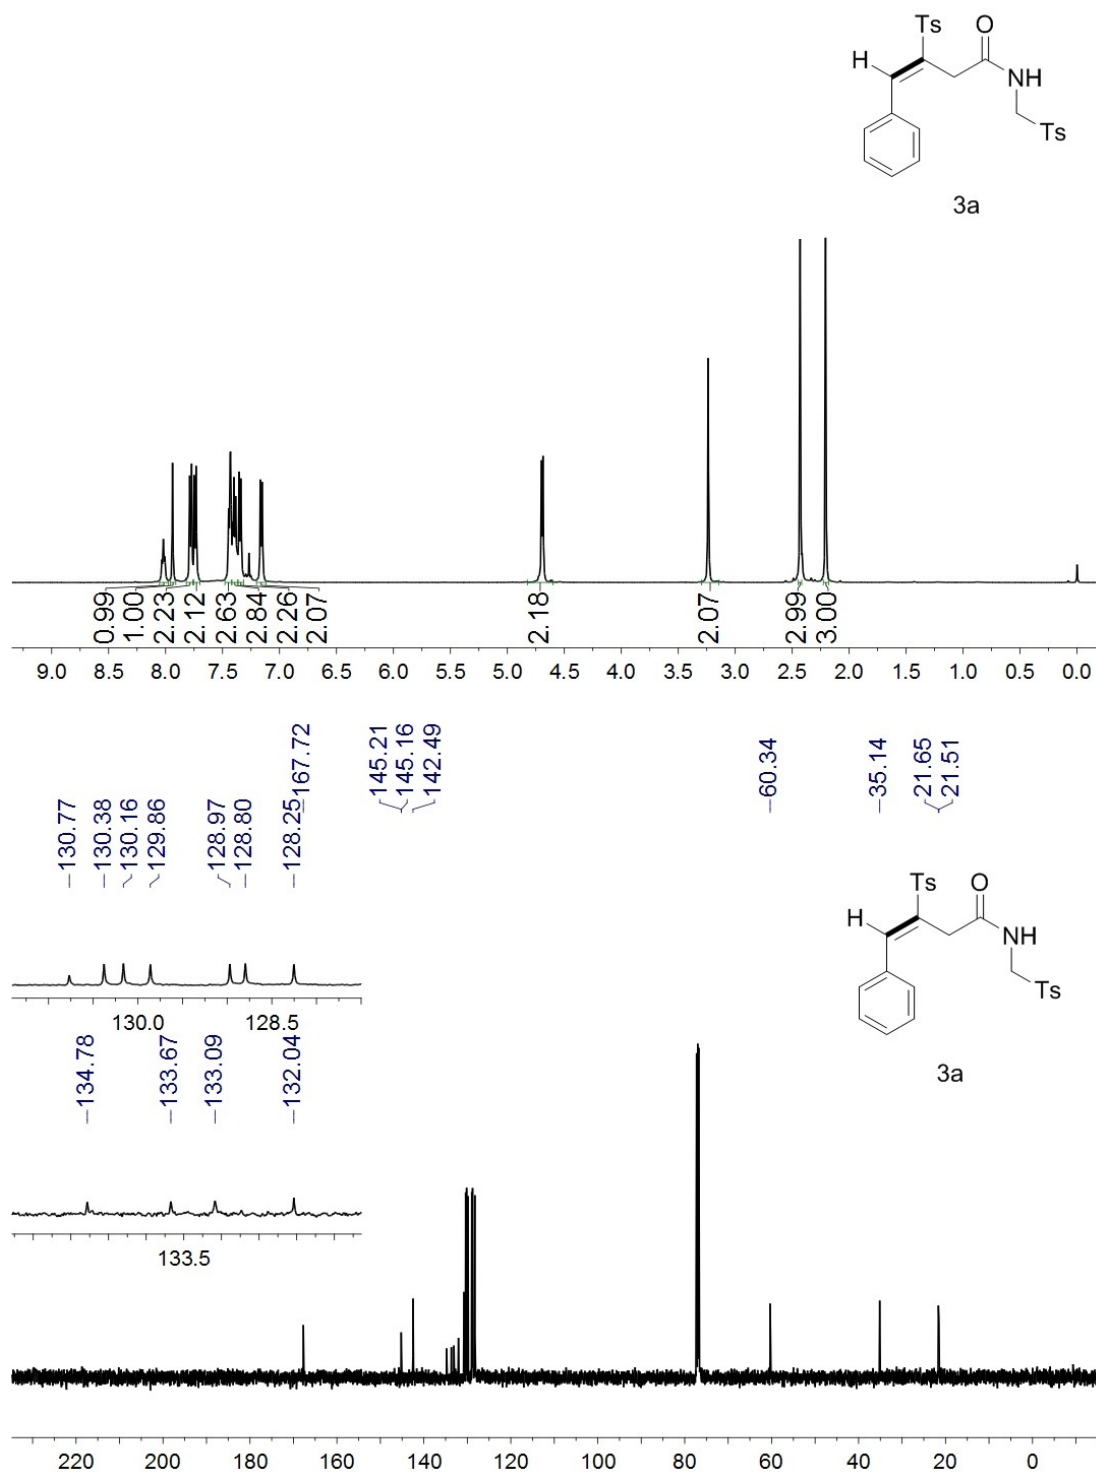

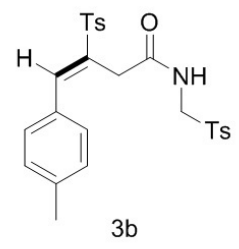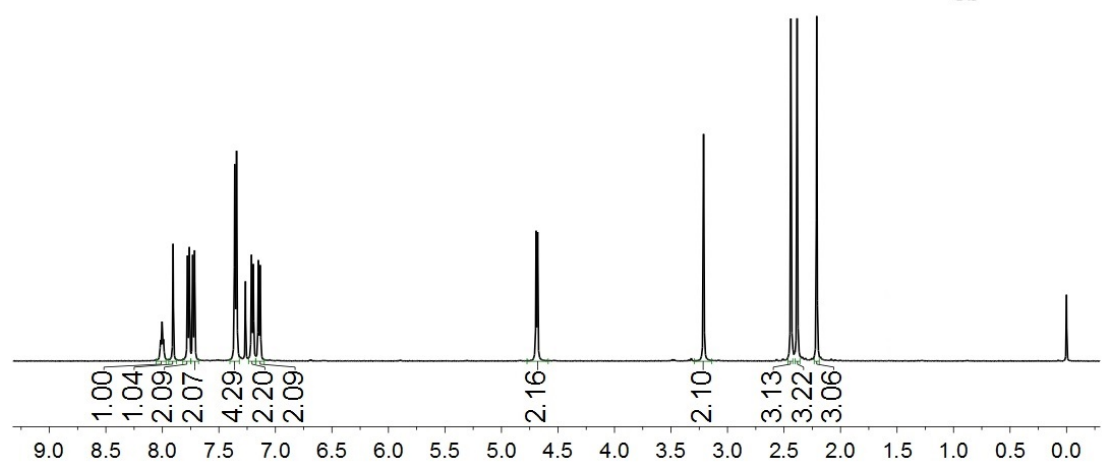

13C NMR chemical shifts (ppm):  
 -167.84  
 145.08  
 142.46  
 141.50  
 134.89  
 133.67  
 131.67  
 -60.34  
 -35.21  
 -21.65  
 -21.49

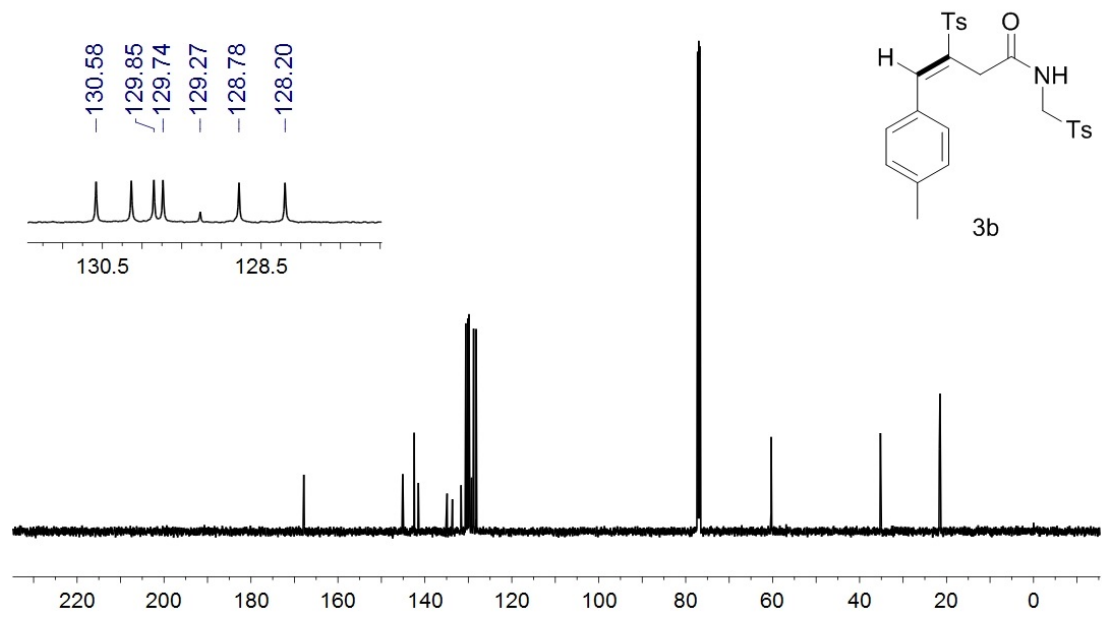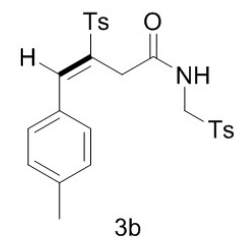

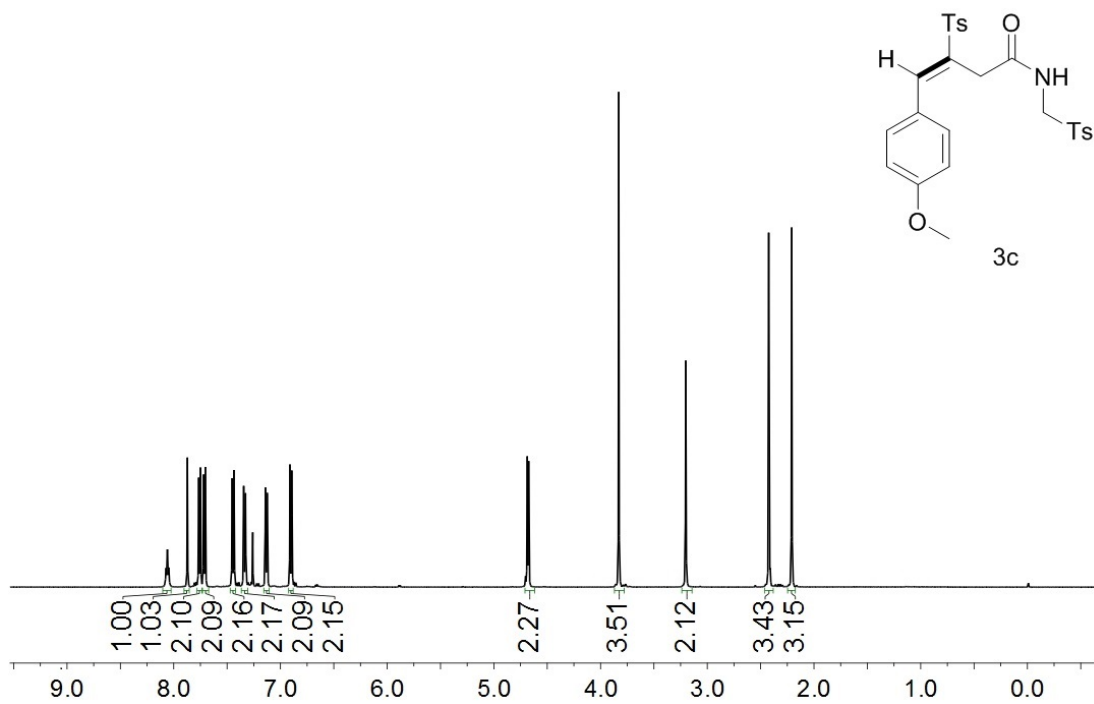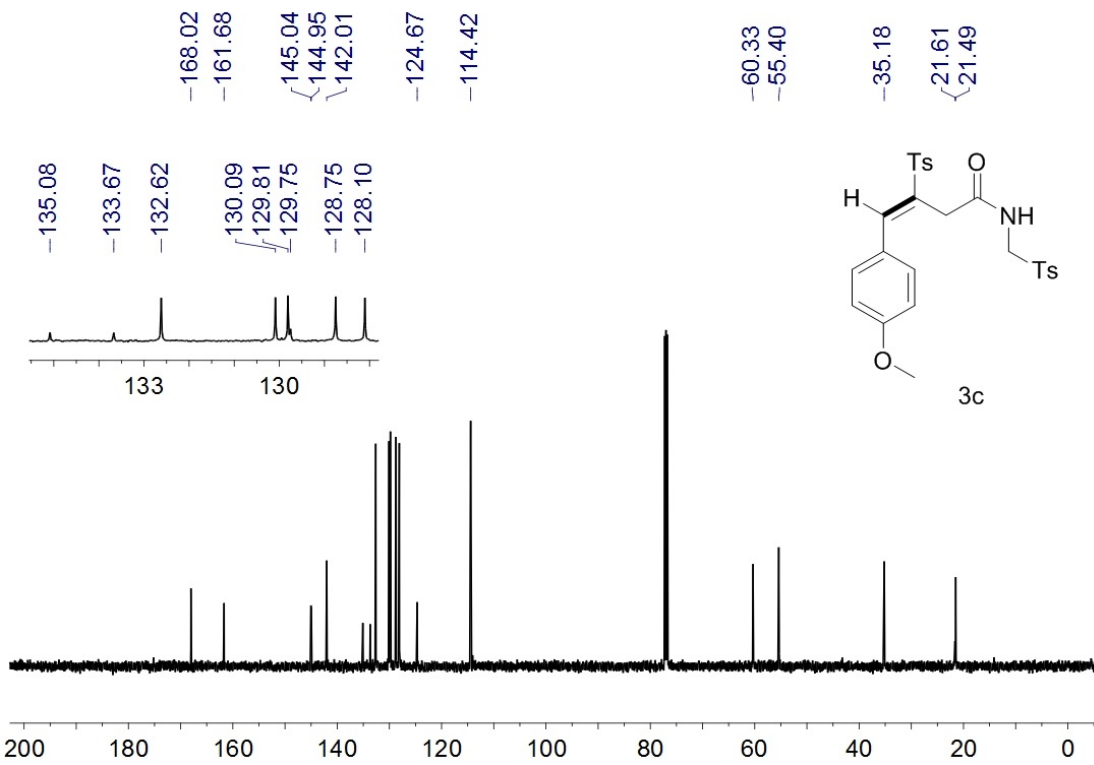

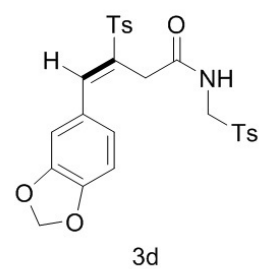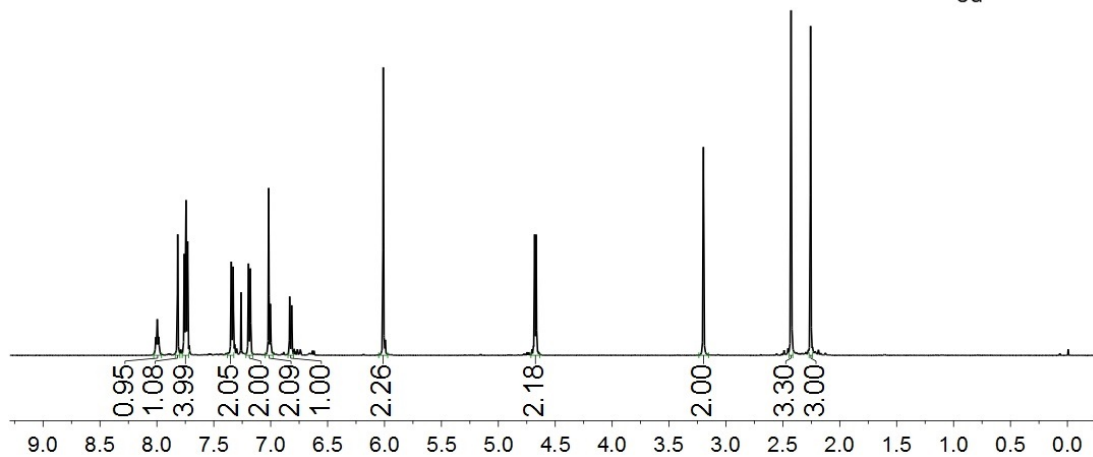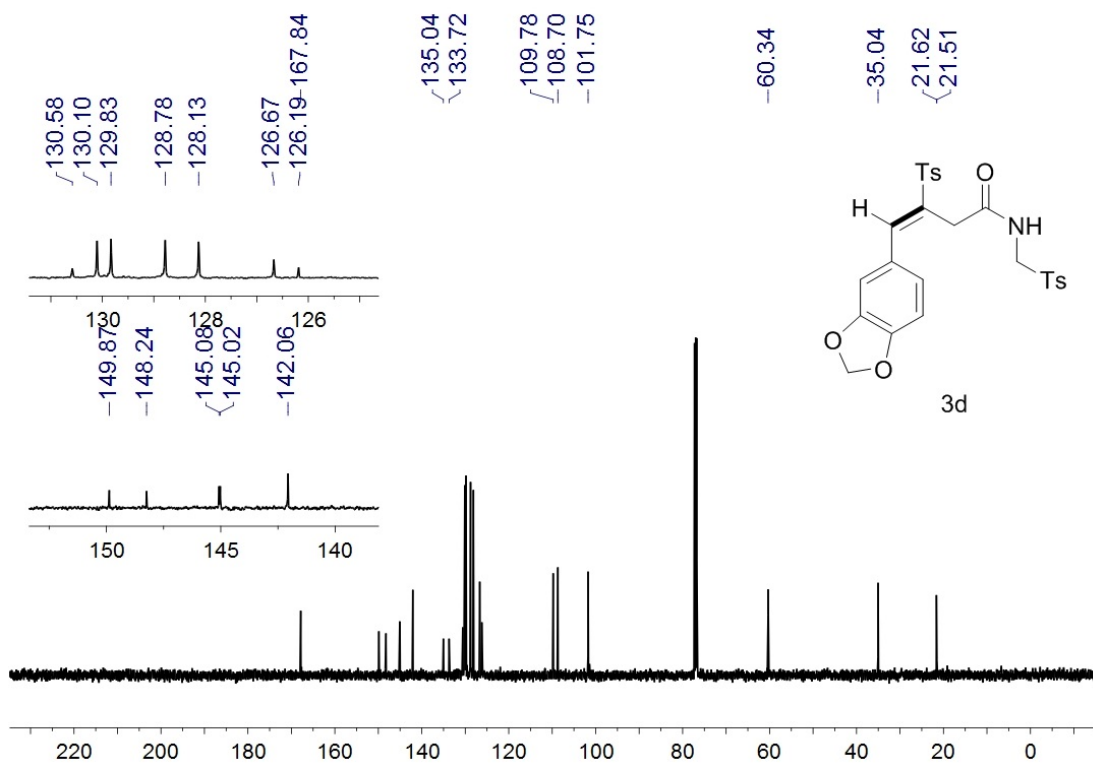

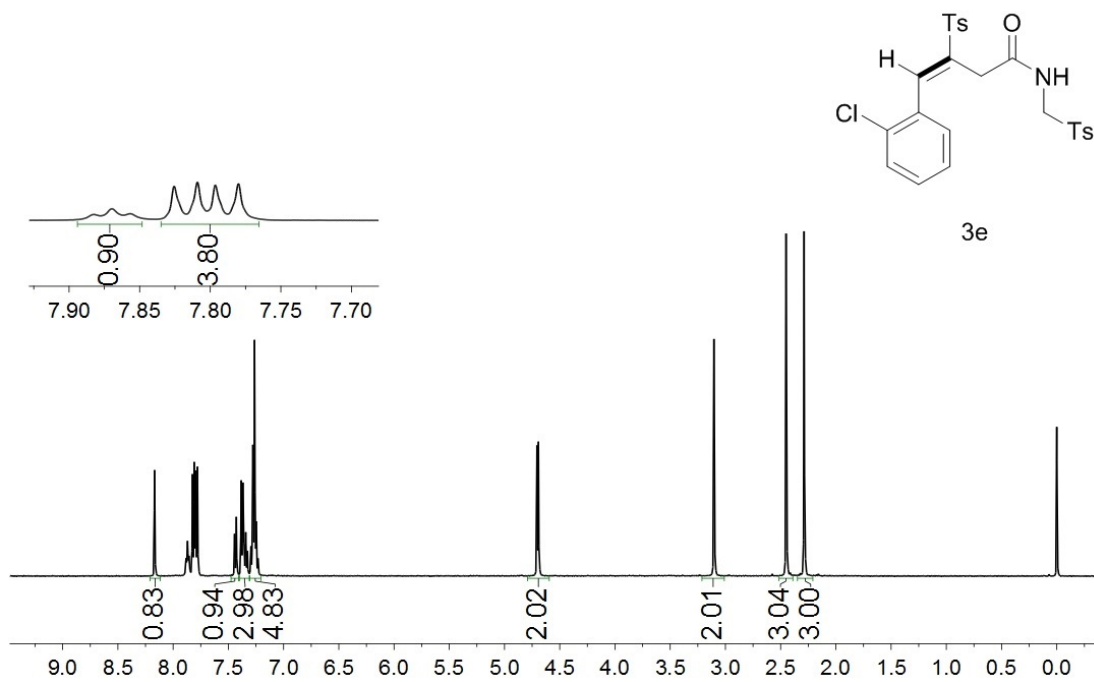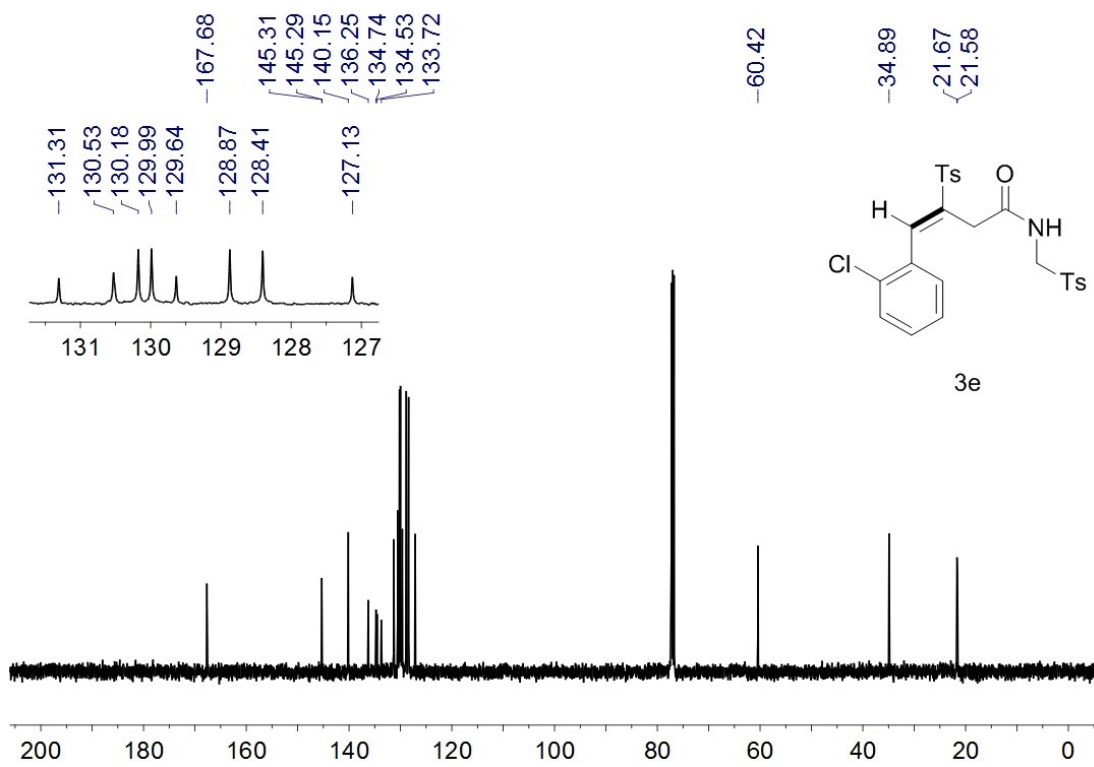

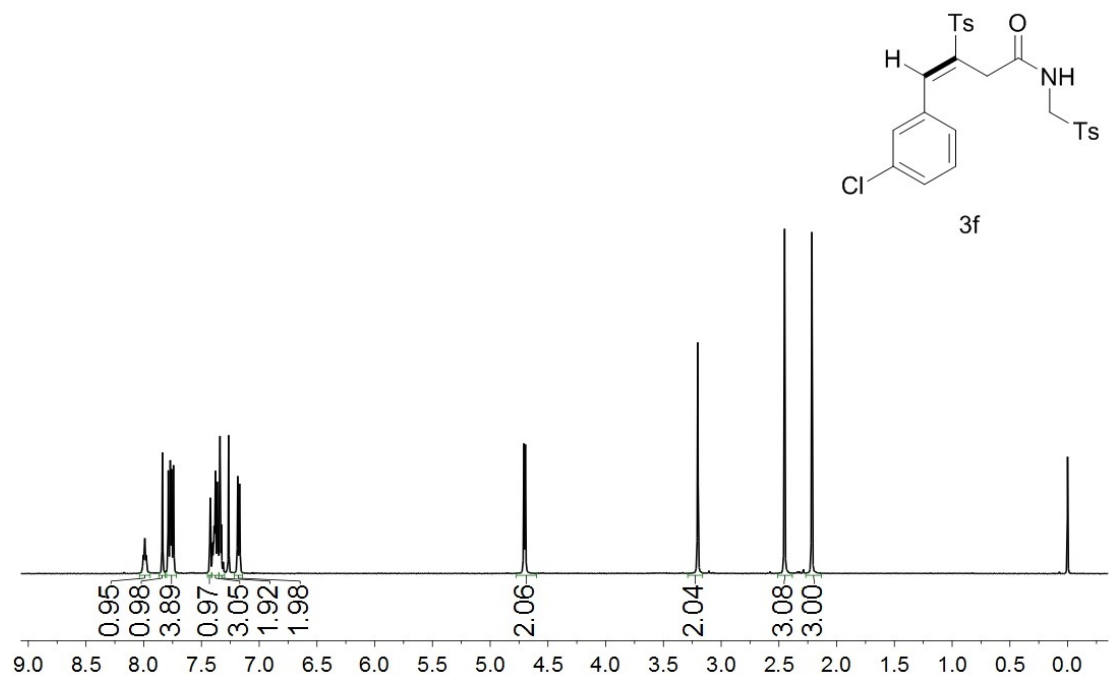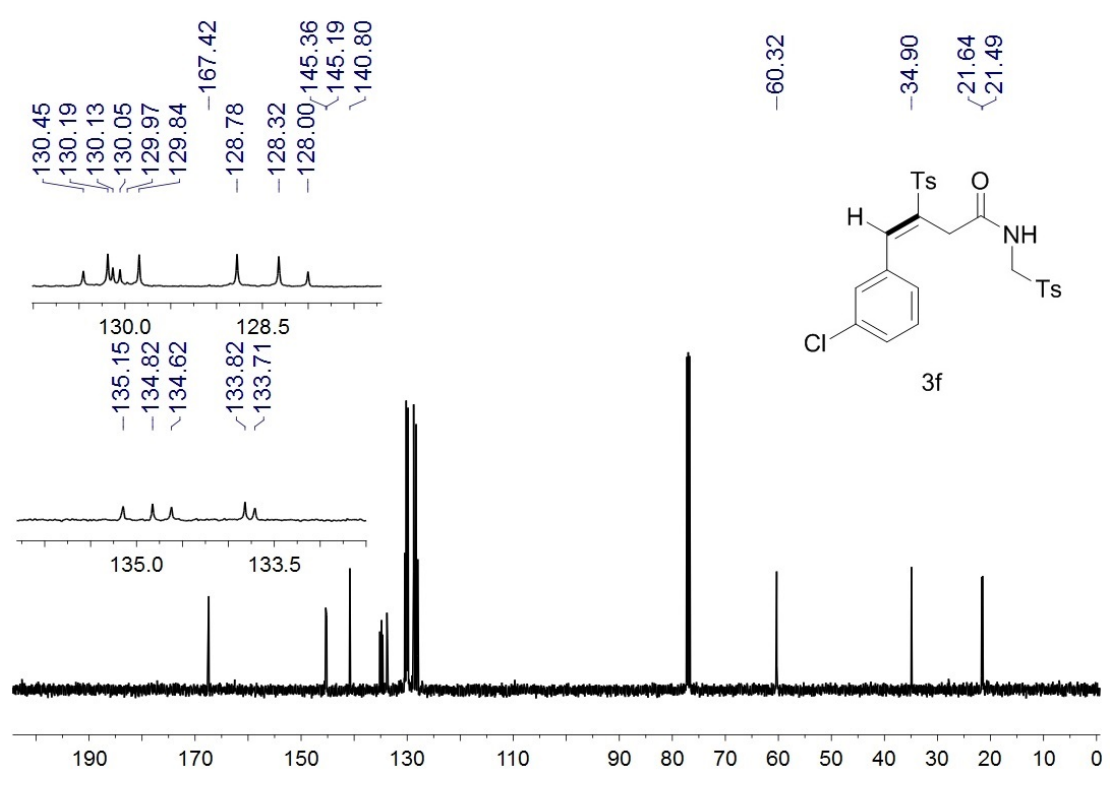

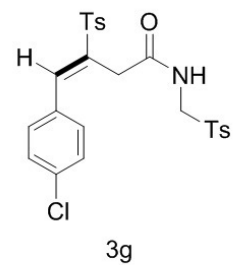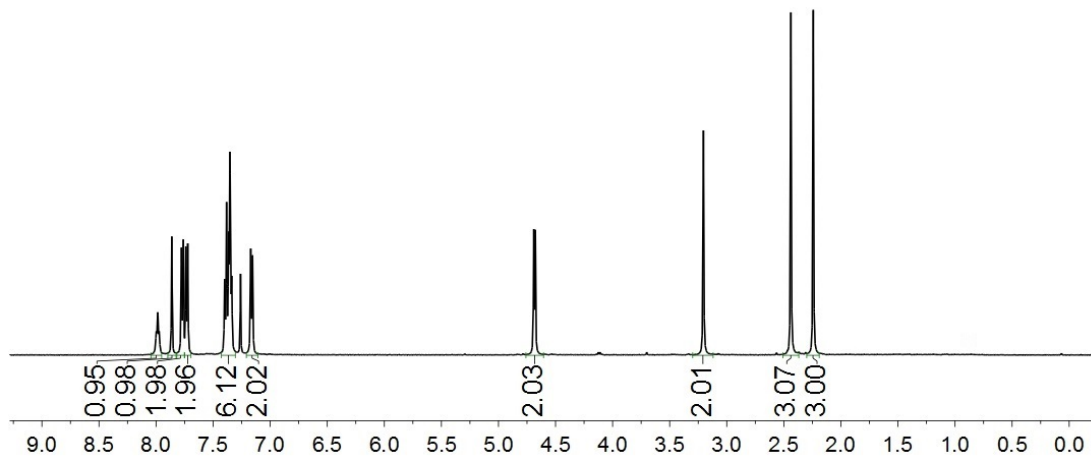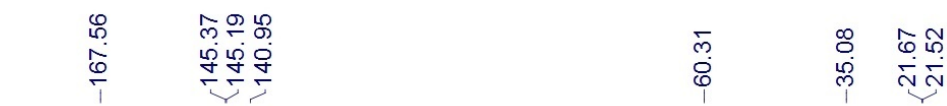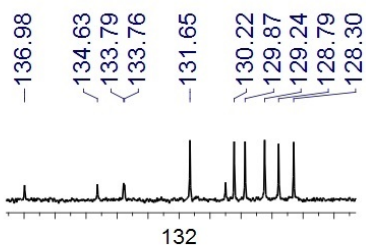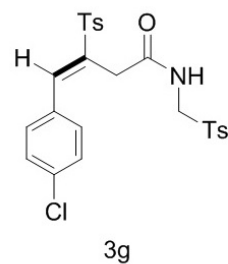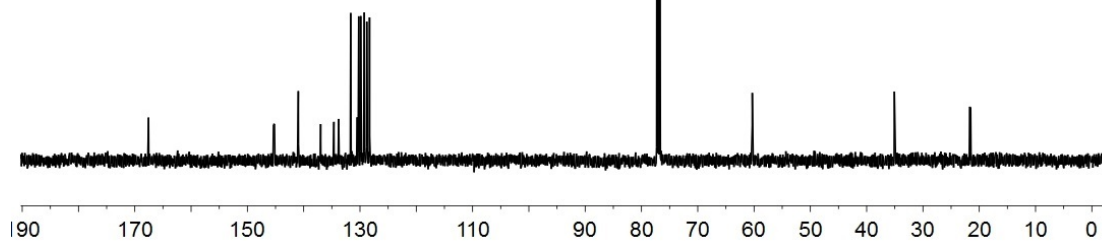



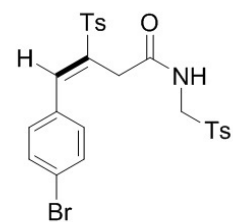

3h

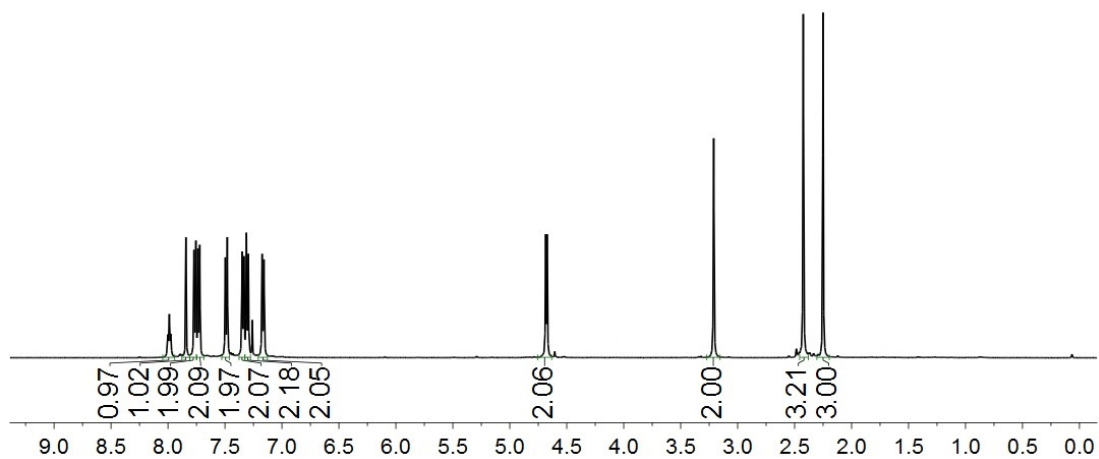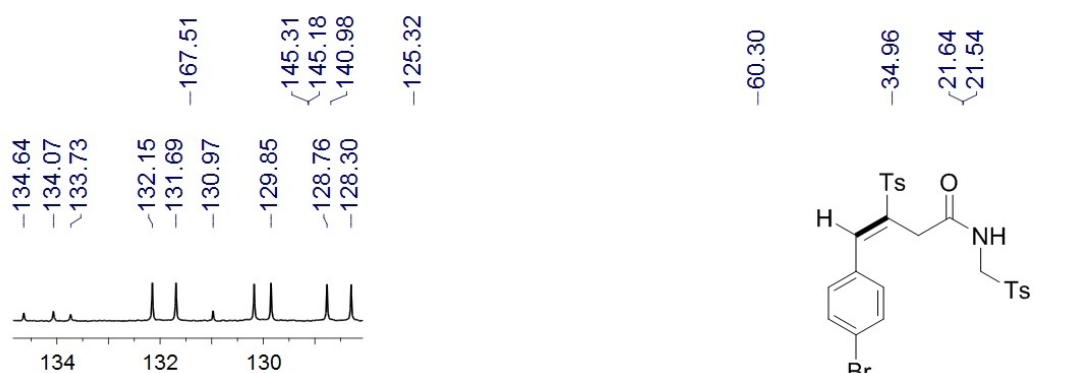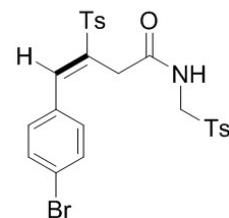

3h

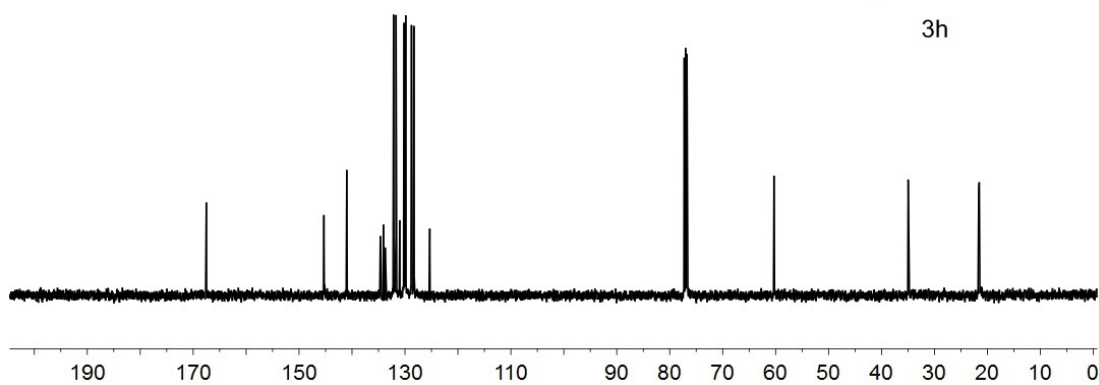

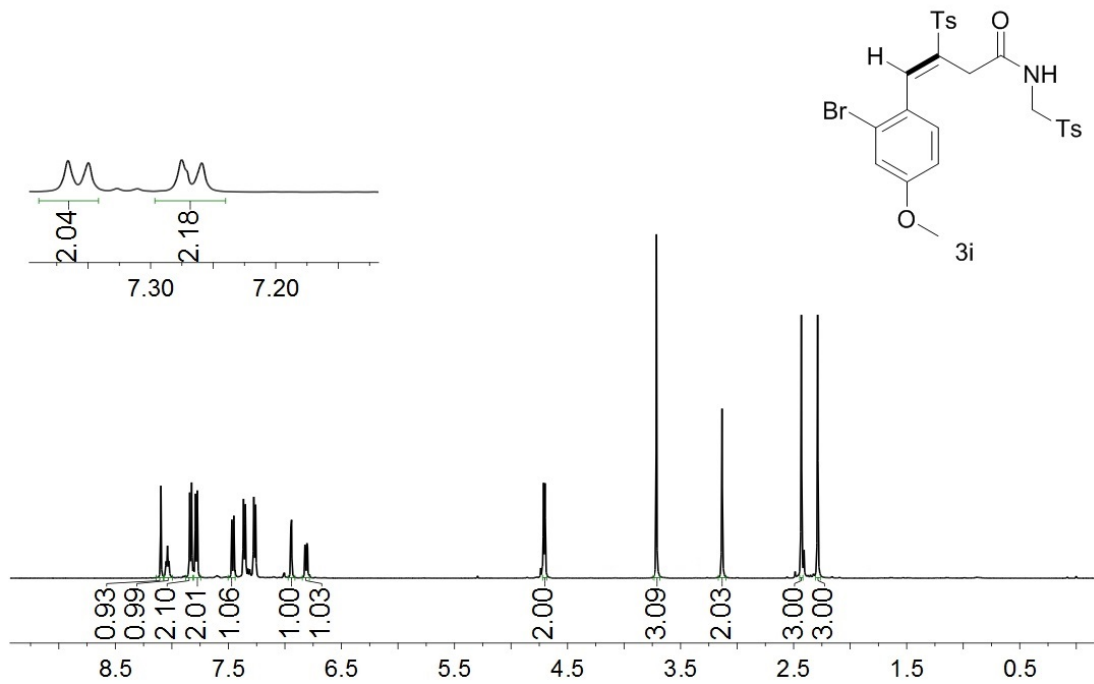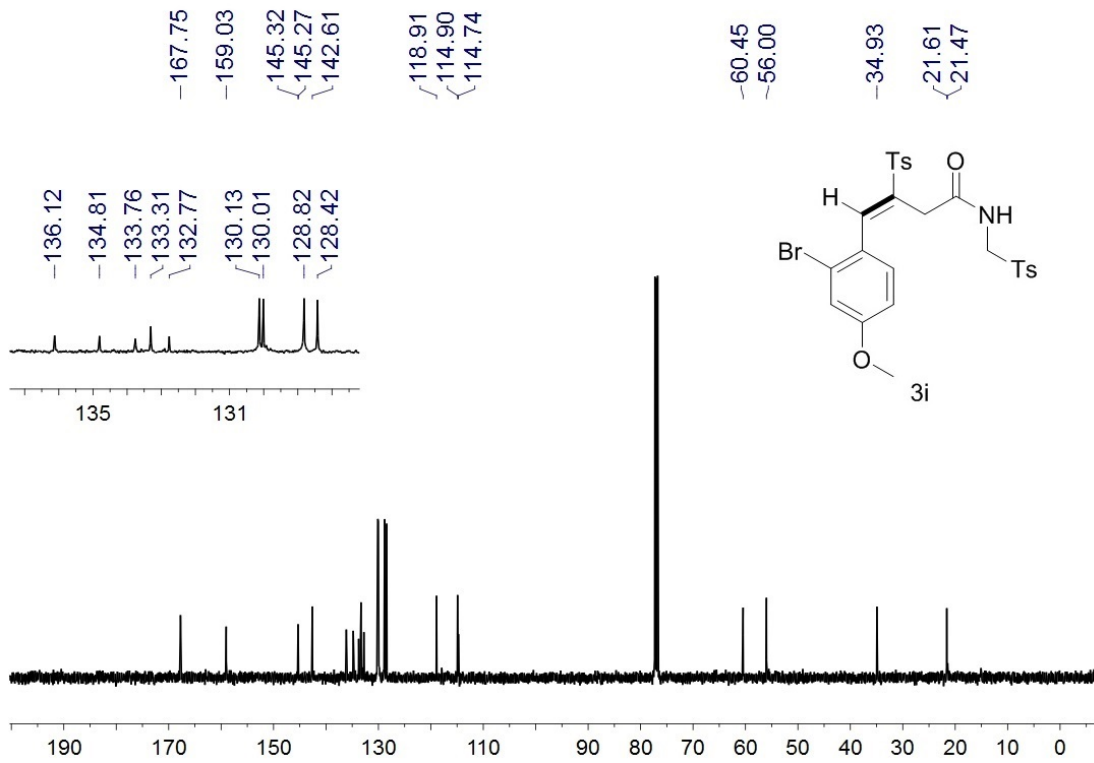

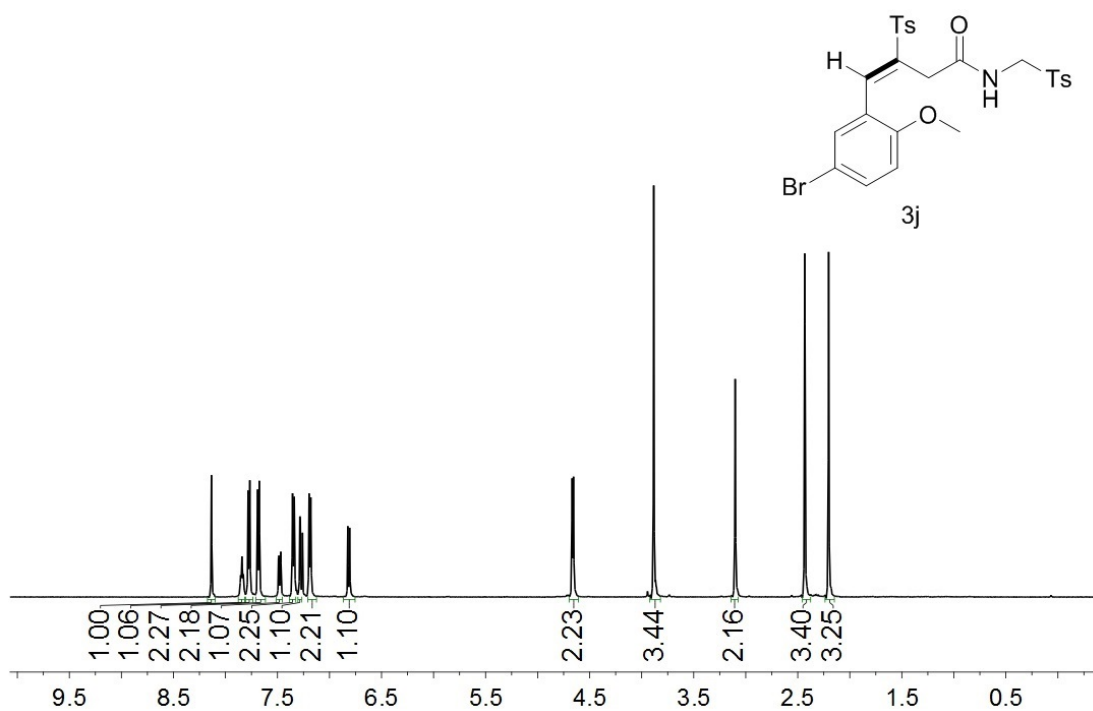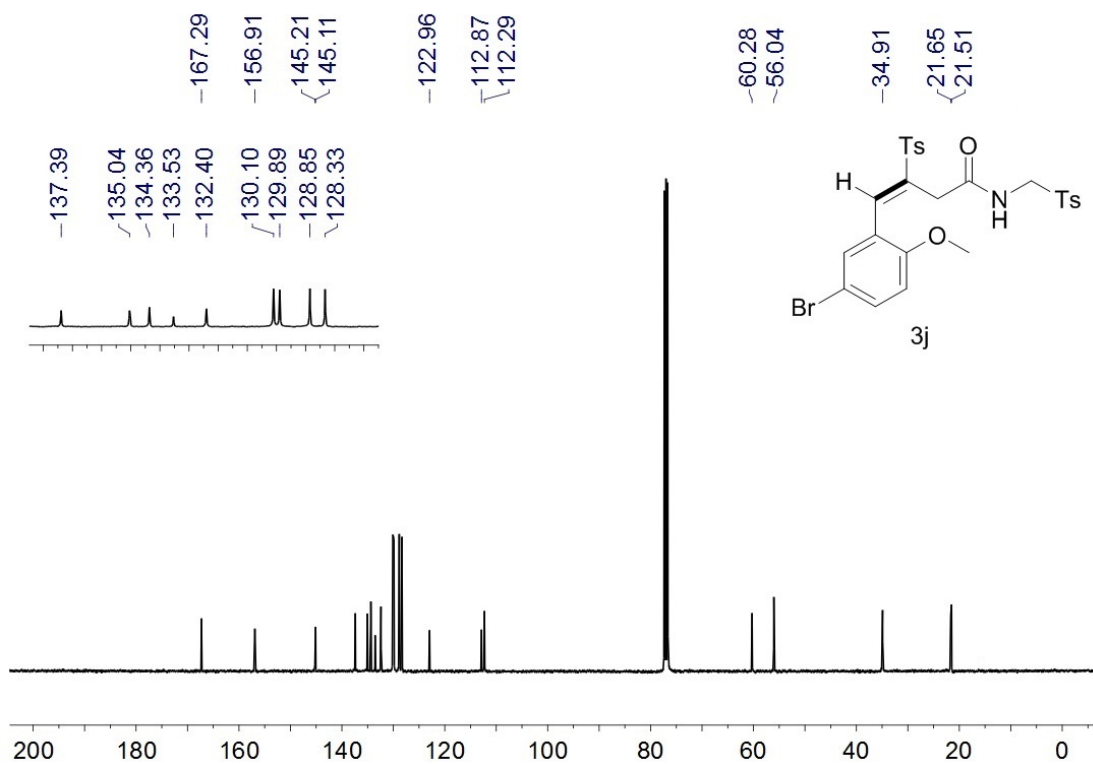

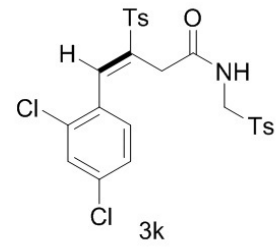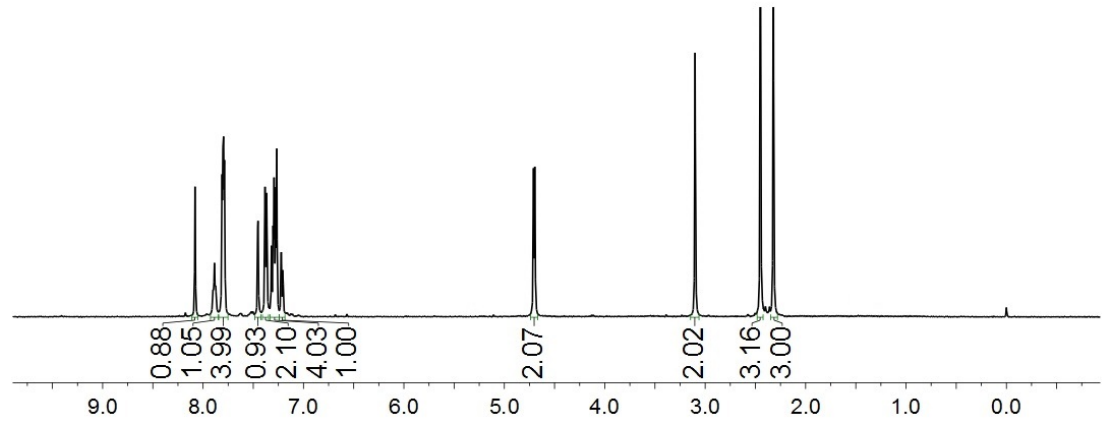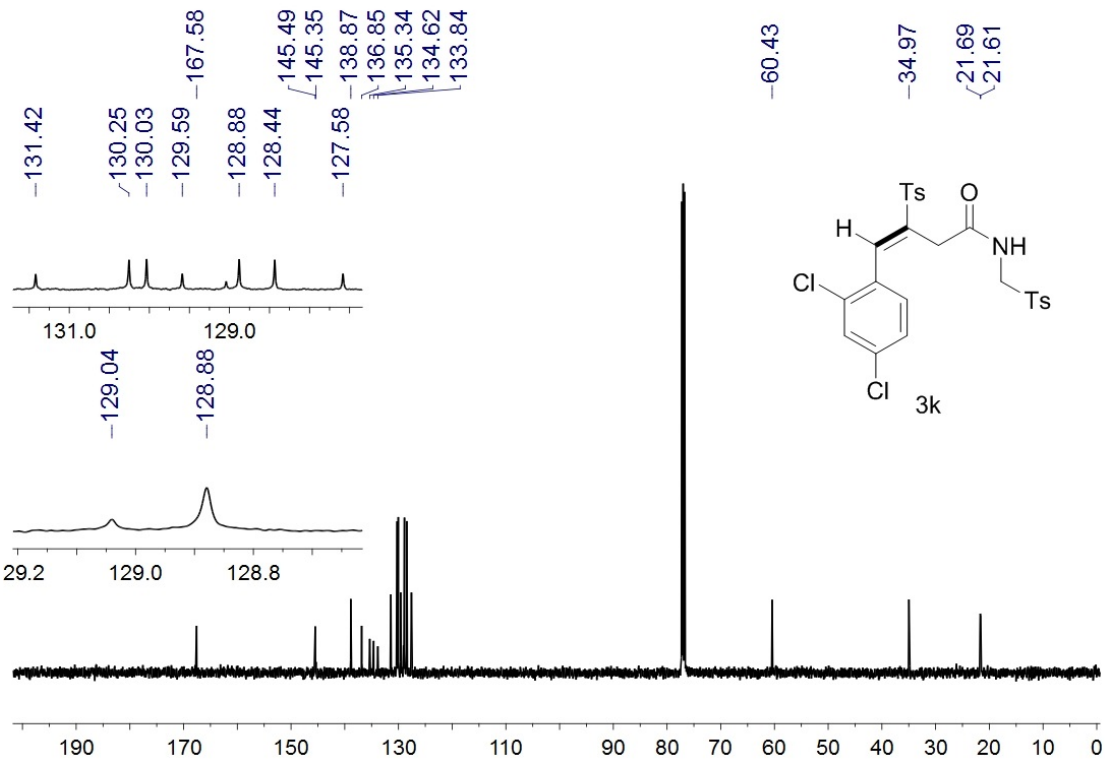

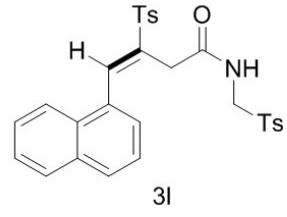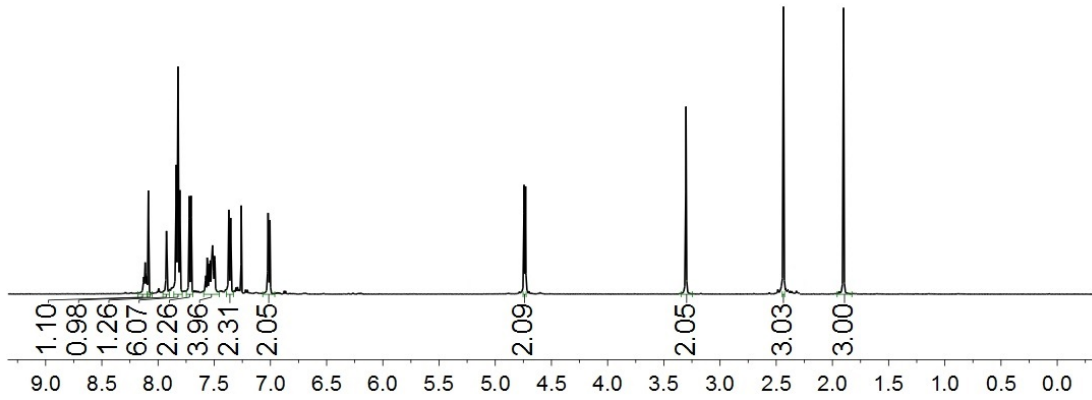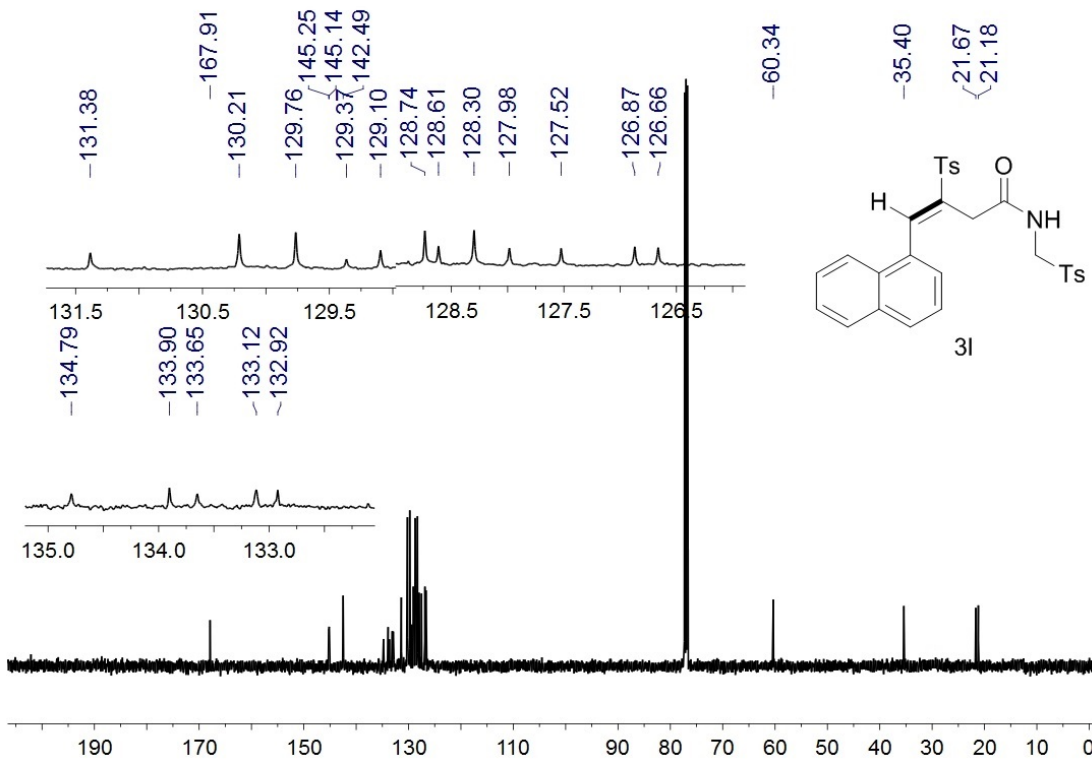

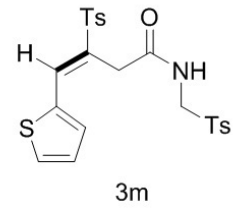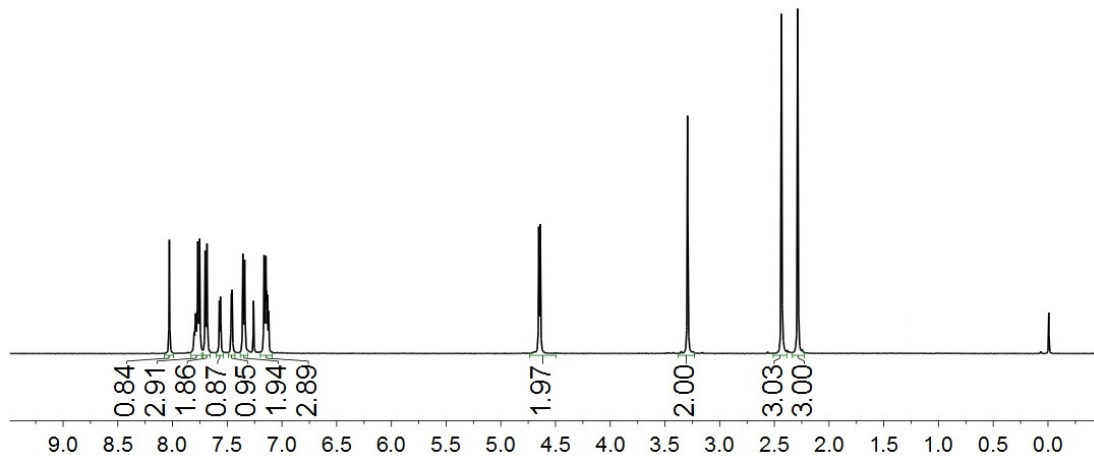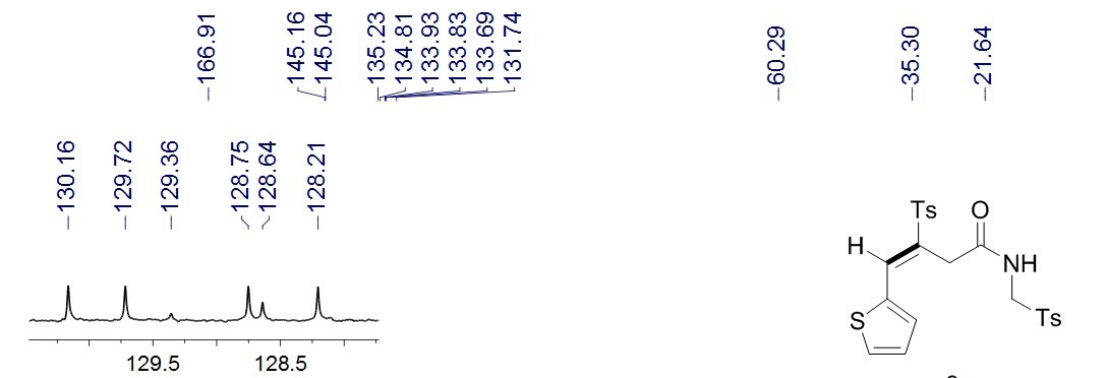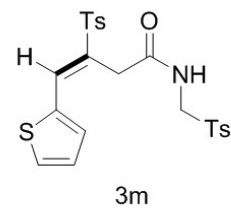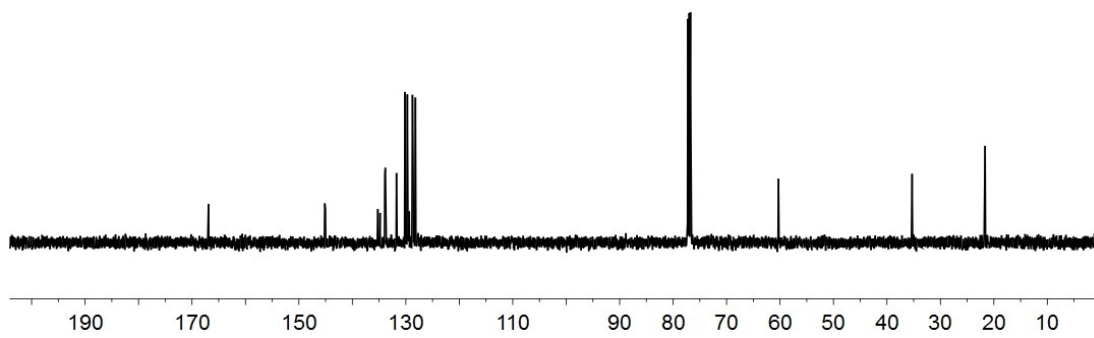

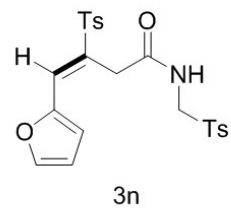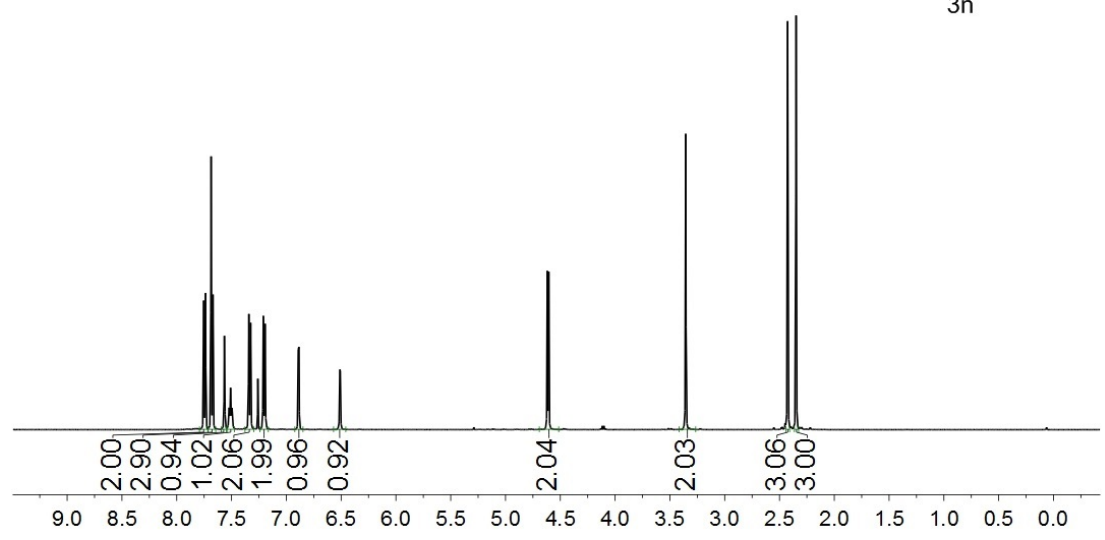

-167.27  
 -146.33  
 -145.07  
 -145.00  
 -134.87  
 -133.83  
 -118.65  
 -112.80

-60.32  
 -35.21  
 -21.67  
 -21.62

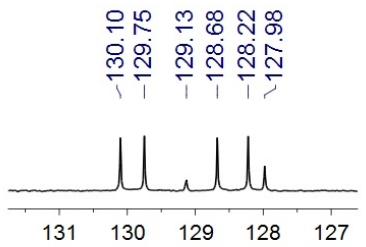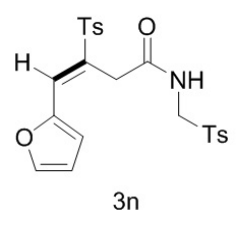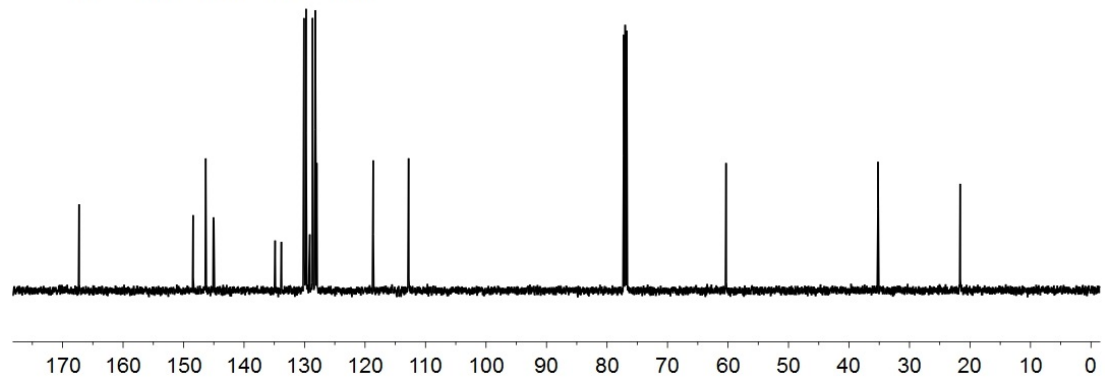

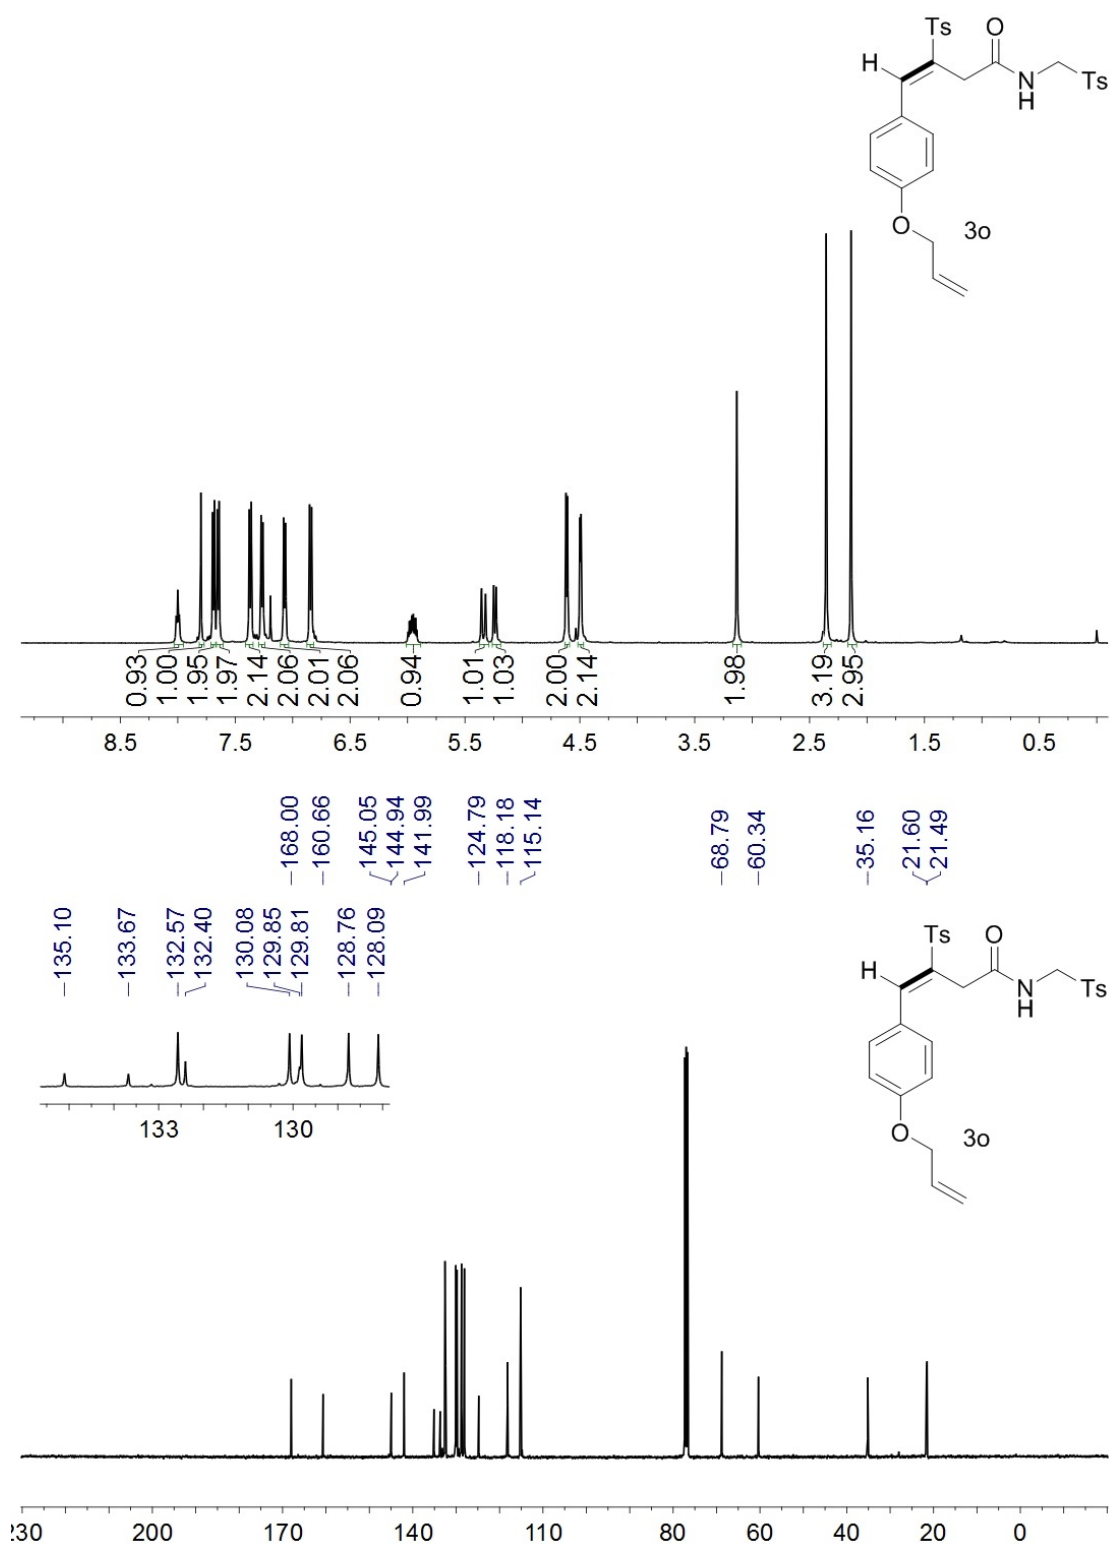



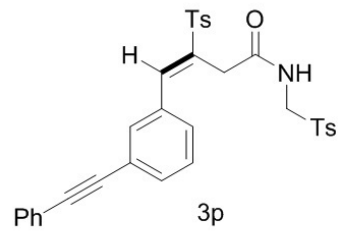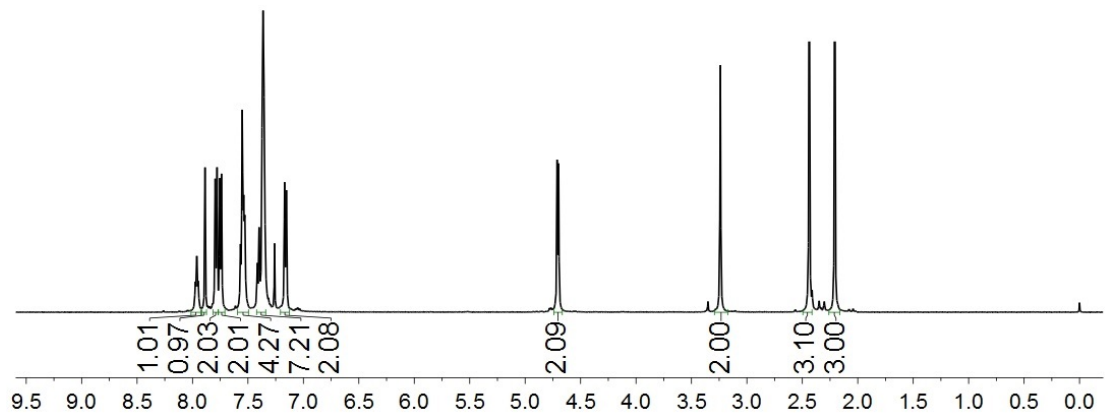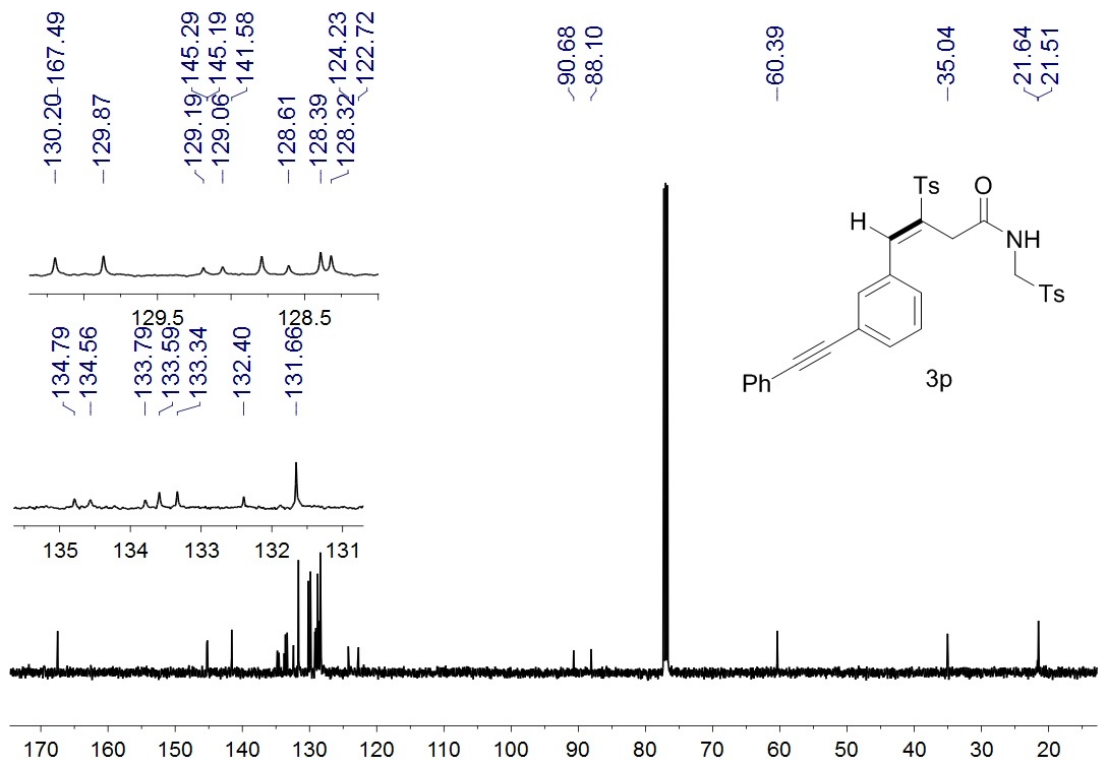

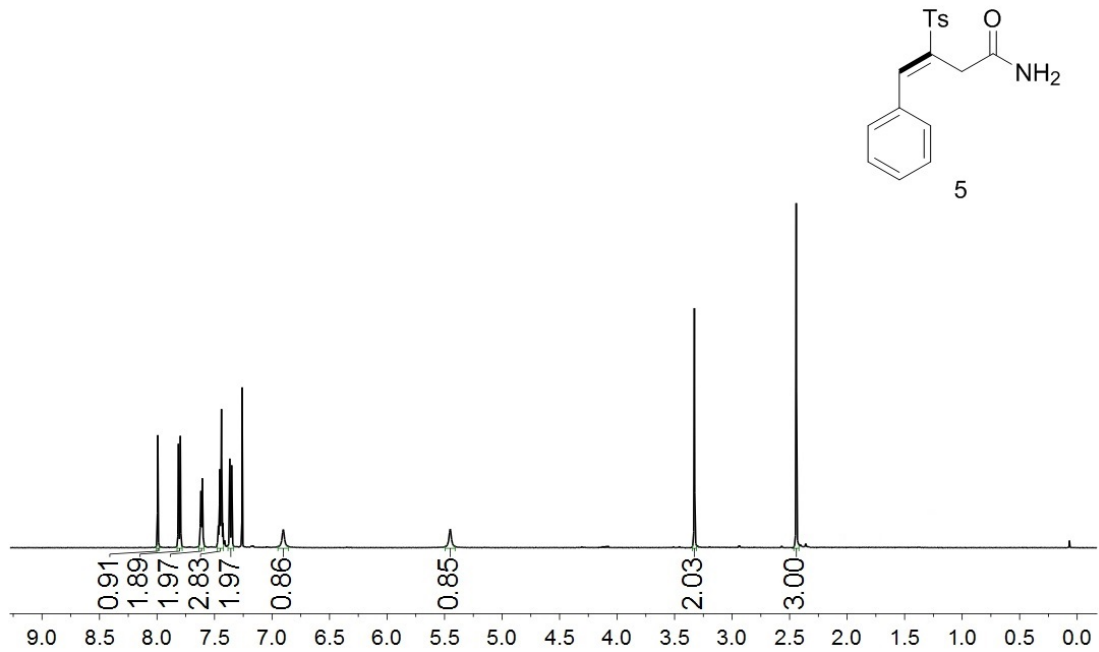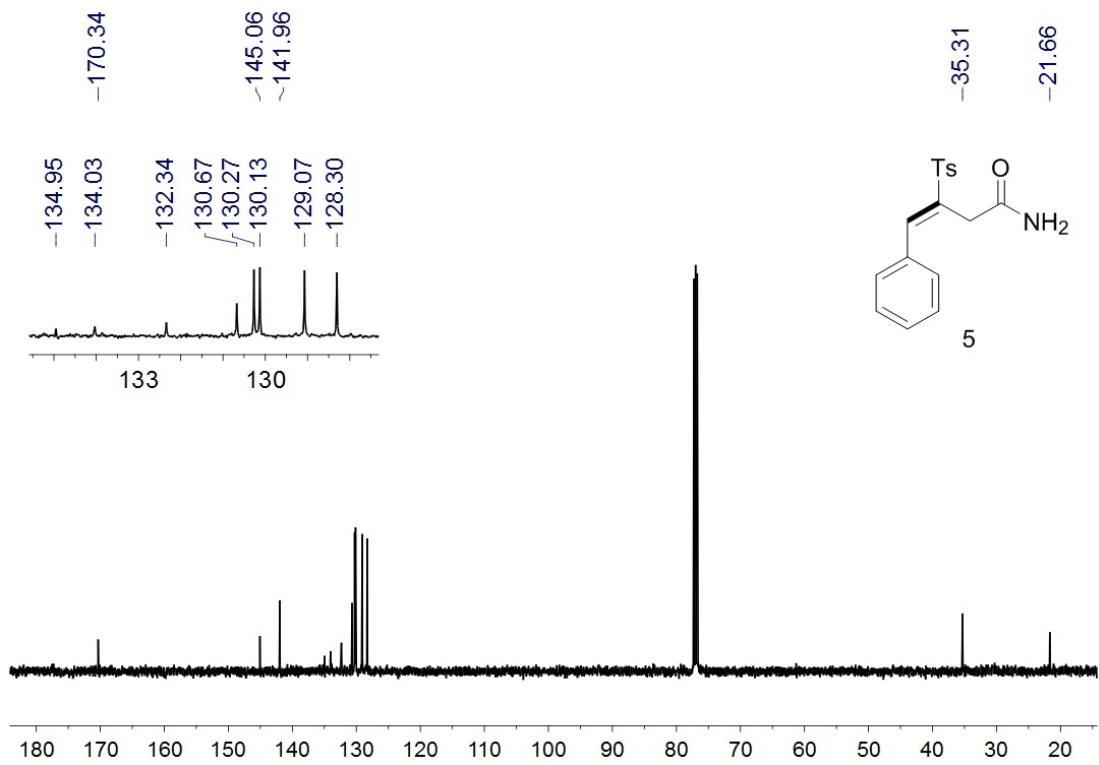

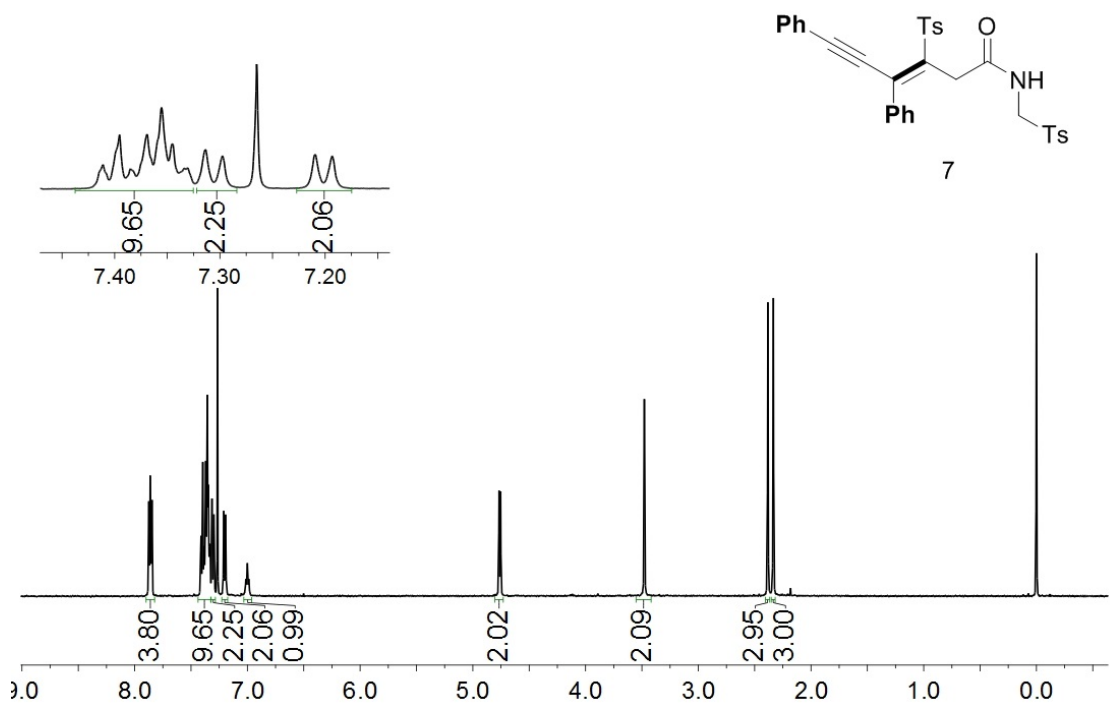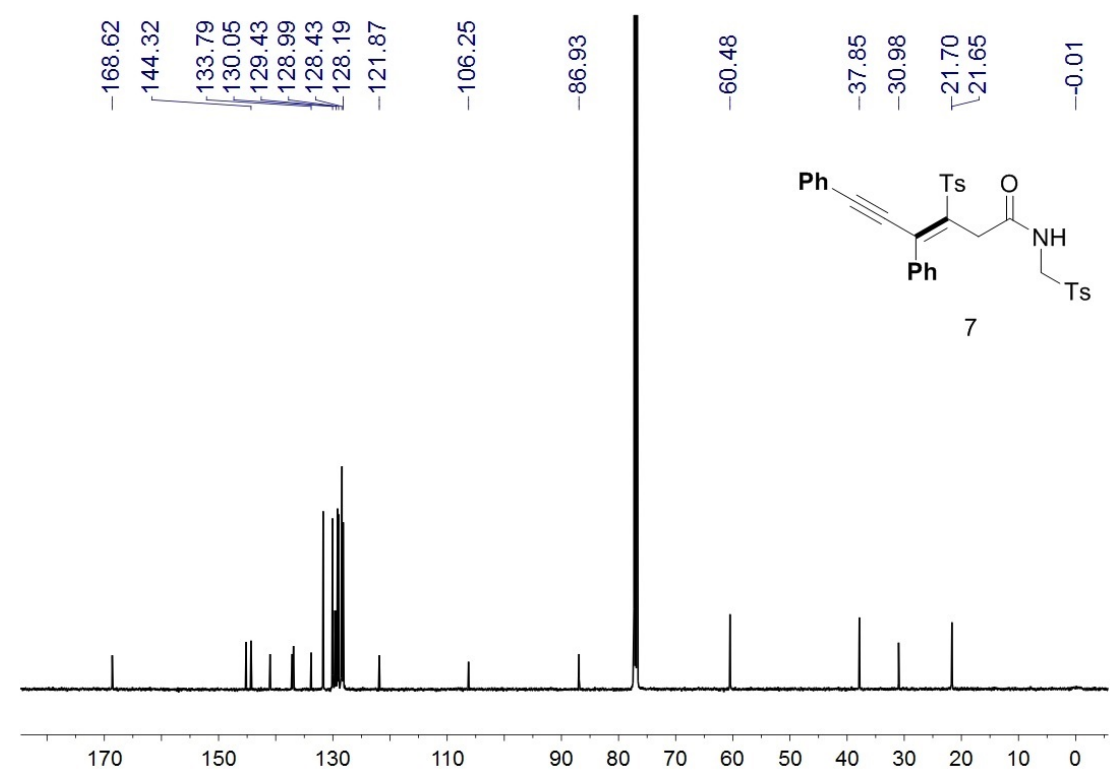

2D-NOSEY of **3a**:

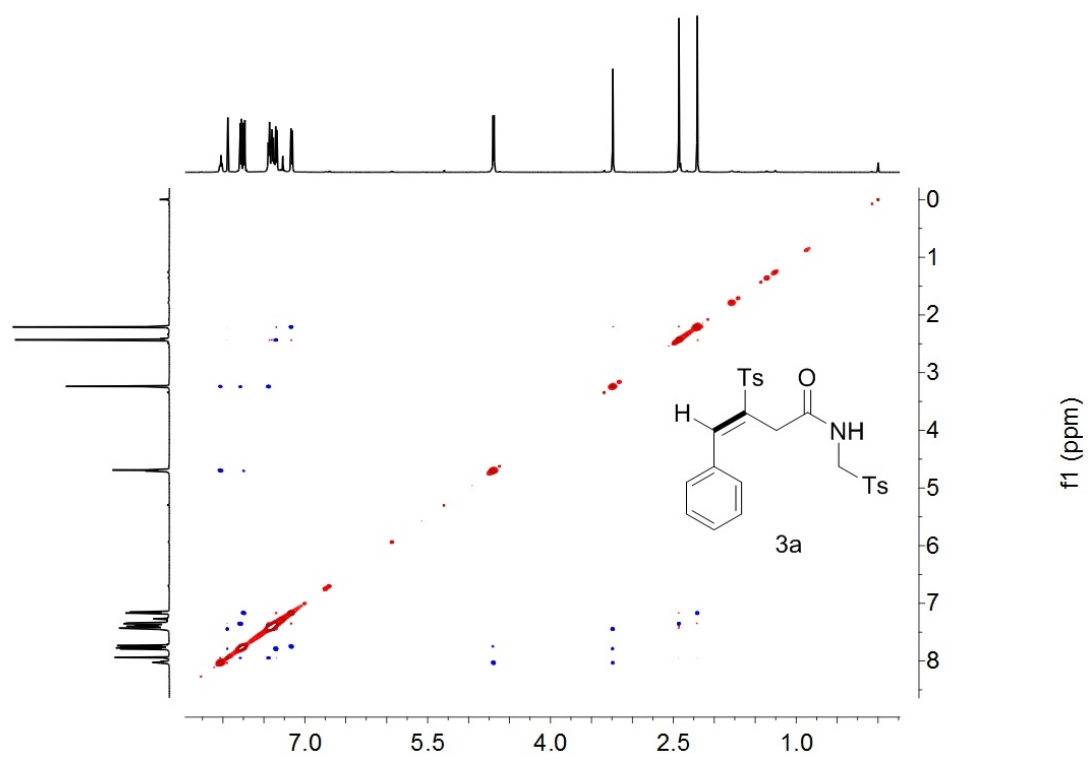

Supplement: c5ob01129a1.pdf [file c5ob01129a1.pdf]
